# Supplementary material for: Chemical genomics reveals histone deacetylases are required for core regulatory transcription
Source: PubMed Central journal article supplement (PMC6614369; doi:10.1038/s41467-019-11046-7), 2019-07-08
Supplement: 41467_2019_11046_MOESM1_ESM.pdf [file 41467_2019_11046_MOESM1_ESM.pdf]

# **Chemical Genomics Reveals Histone Deacetylases are Required for Core Regulatory Transcription**

Gryder, Wu, et al.

**Supplementary Figures and Legends**

**Supplementary Methods, including synthesis of HDAC3 selective inhibitor LW3.**

**Supplementary Tables**

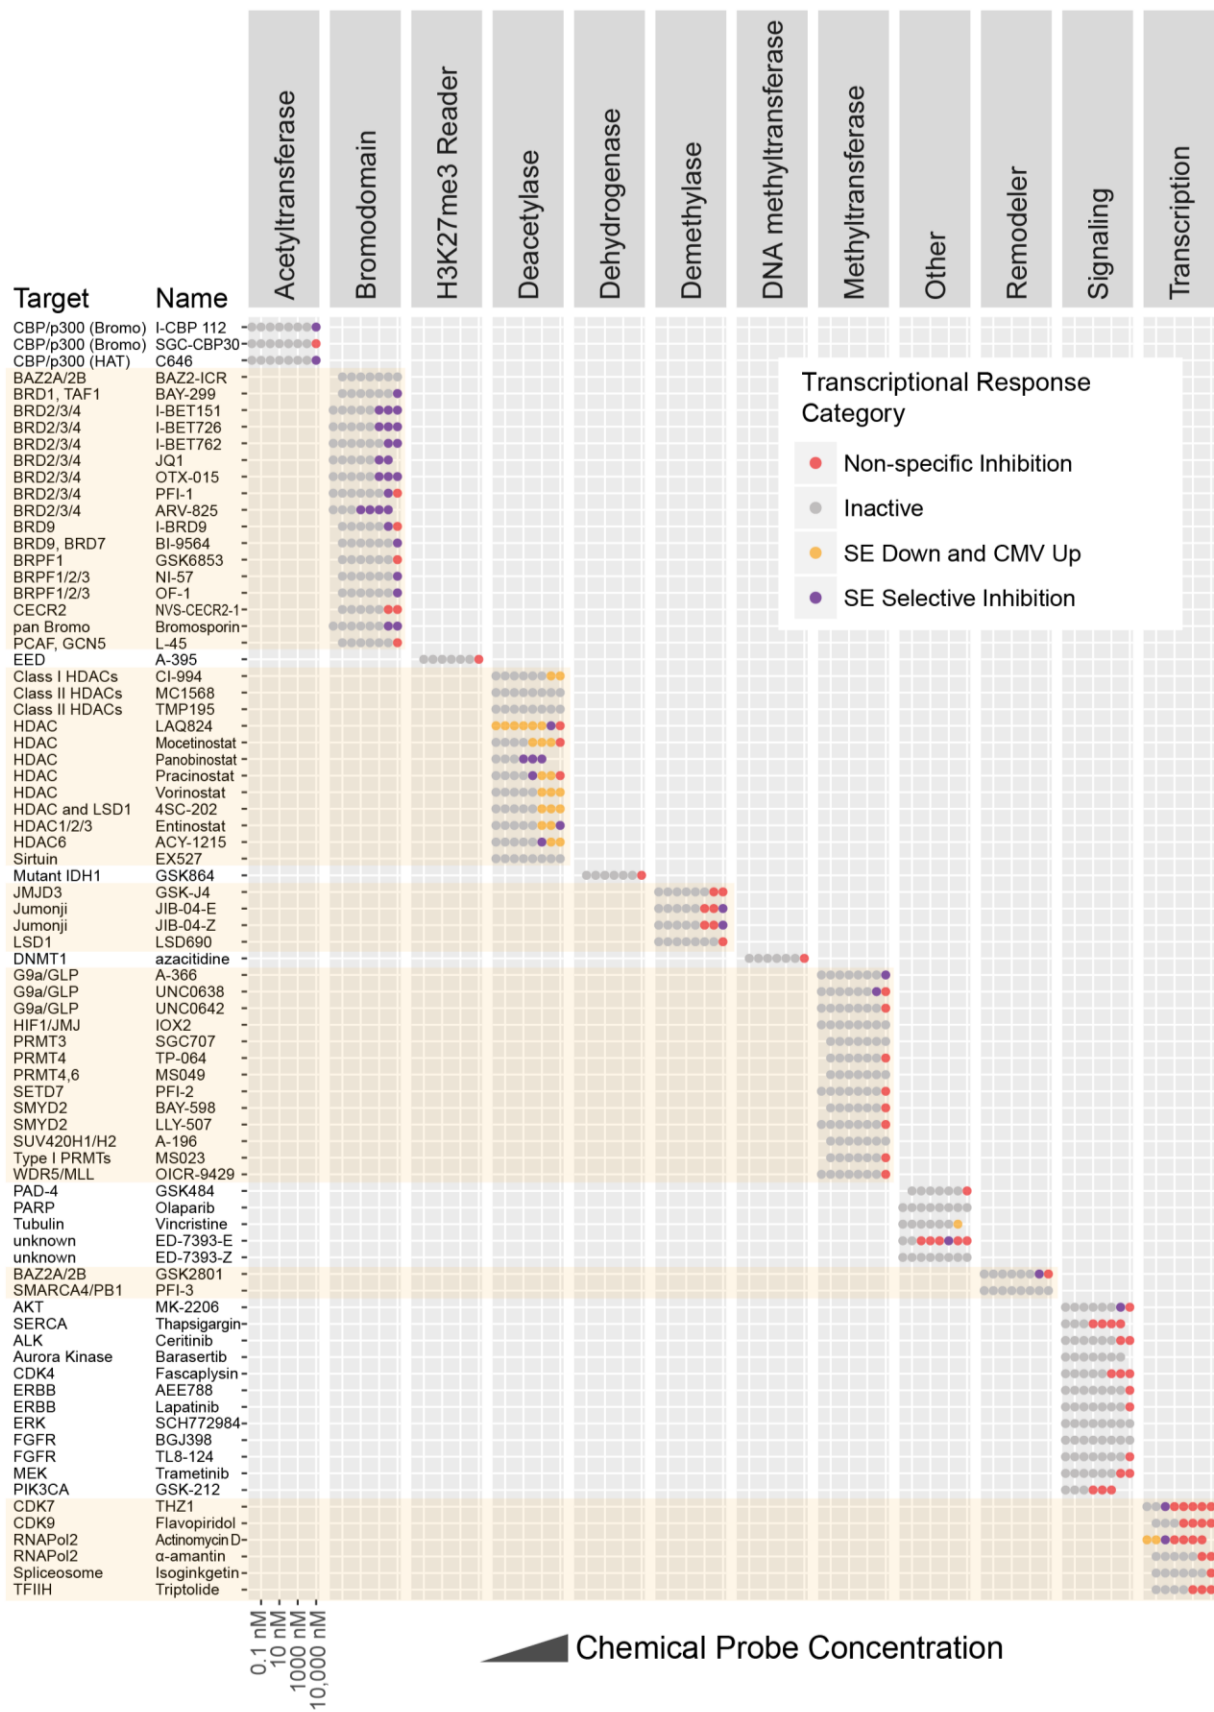

**Supplemental Figure 1. Chemical screen for core regulatory transcription**

Summary of epigenetic focused SE screen. Each dot represents quadruplicate experiments at the indicated dose of the indicated drug. Known targets and drug names are given in the column to the left, and are sorted by category. Color indicates class as demarcated by the legend.

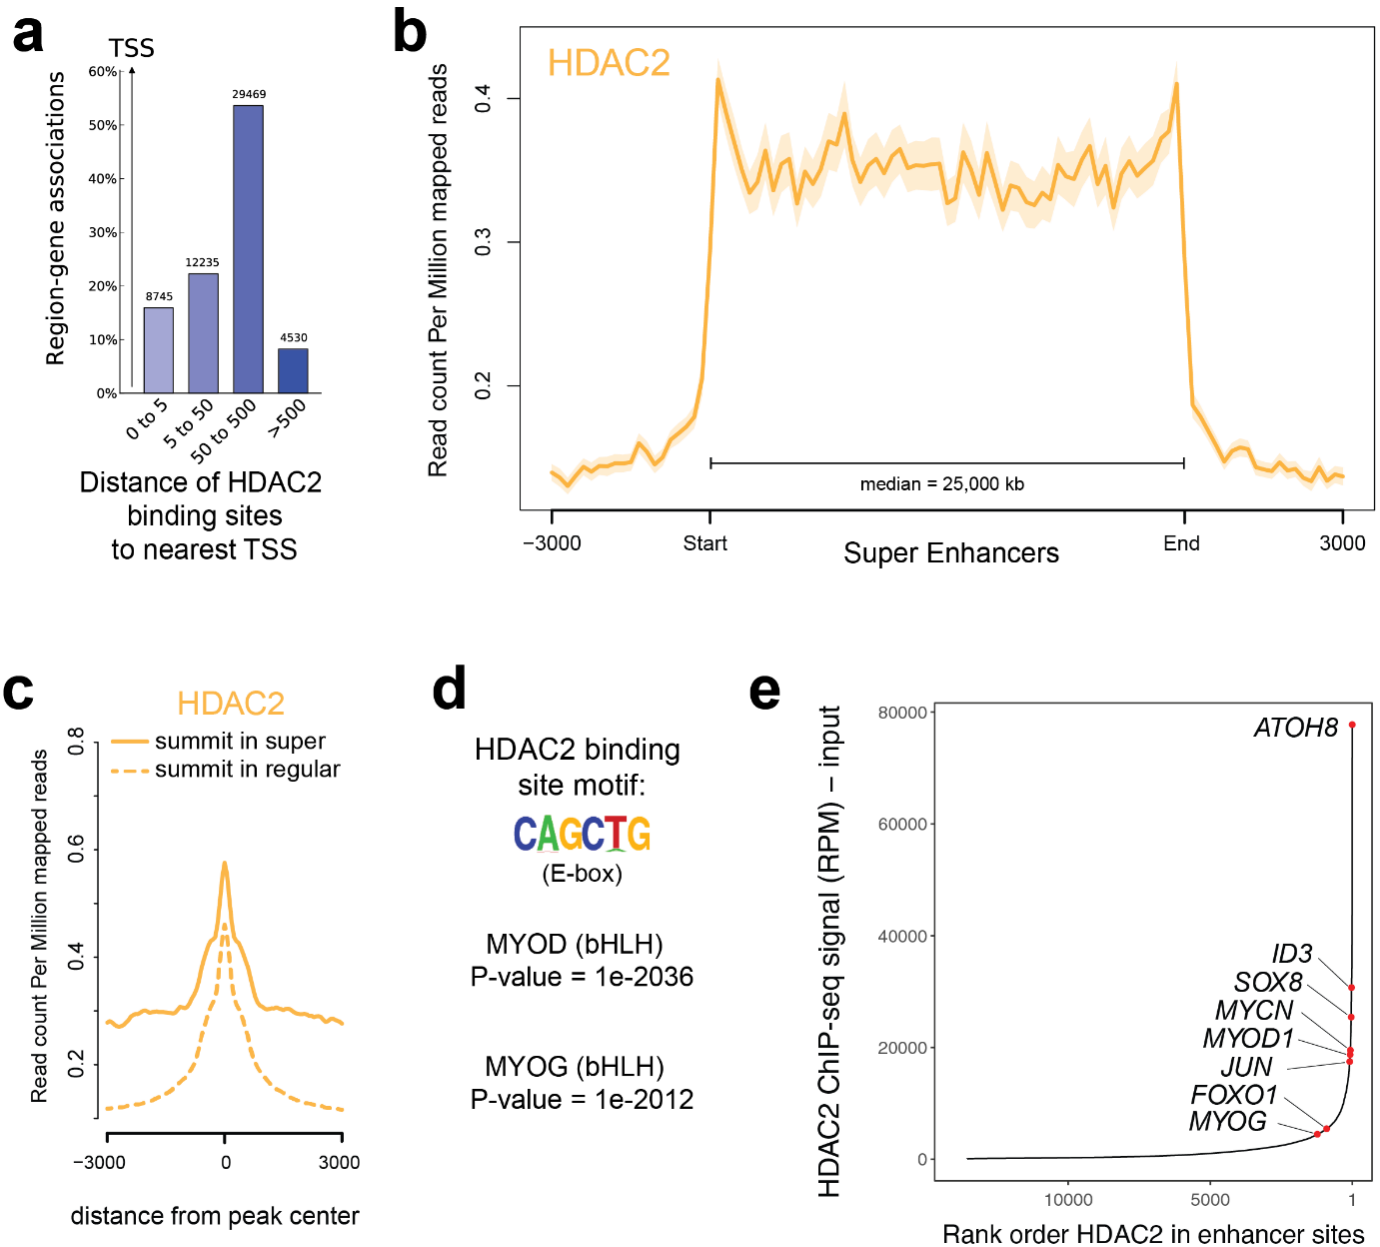

### Supplemental Figure 2. Genomic distribution of HDAC2 in Rhabdomyosarcoma cells

(a) Distribution of HDAC2 ChIP-seq peak distances from the nearest TSS, in kilobases.

(b) HDAC2 ChIP-seq profile at super enhancers.

(c) Individual HDAC2 densities for constituent peaks found within enhancers of either super or regular architecture.

(d) Motif enrichment at HDAC2 sites in FP-RMS cell line RH4.

(e) Asymmetric distribution of HDAC2 at genomic enhancer sites, clusters using the same algorithm used more routinely for H3K27ac (ROSE).

**a** Benzamide HDACi time course

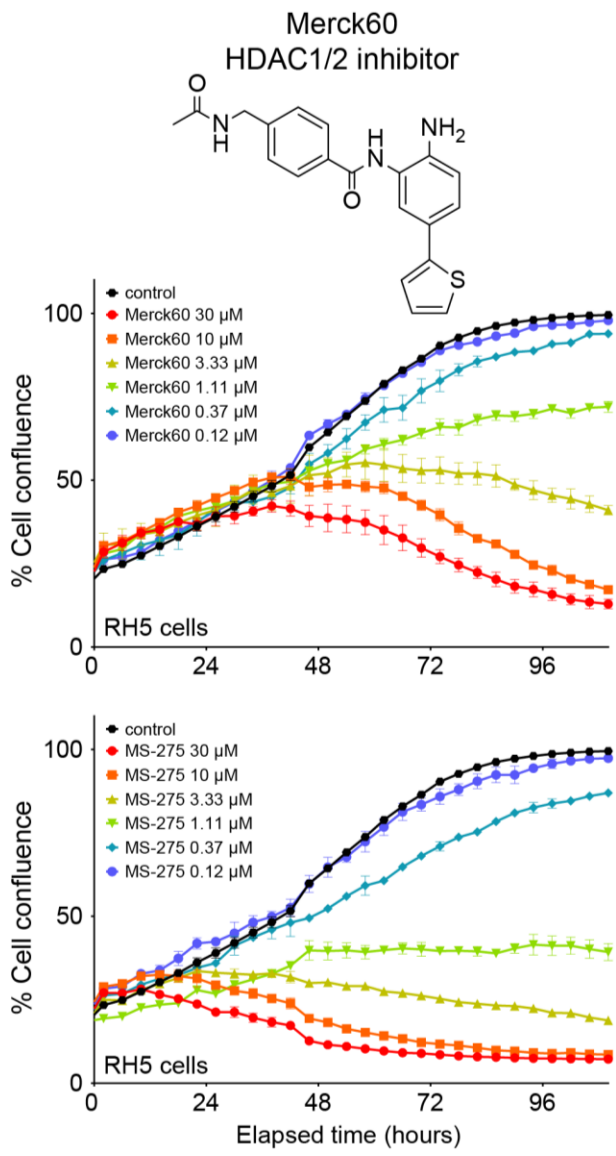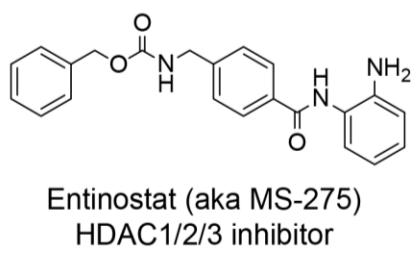

**b** Hydroxamic Acid HDACi time course

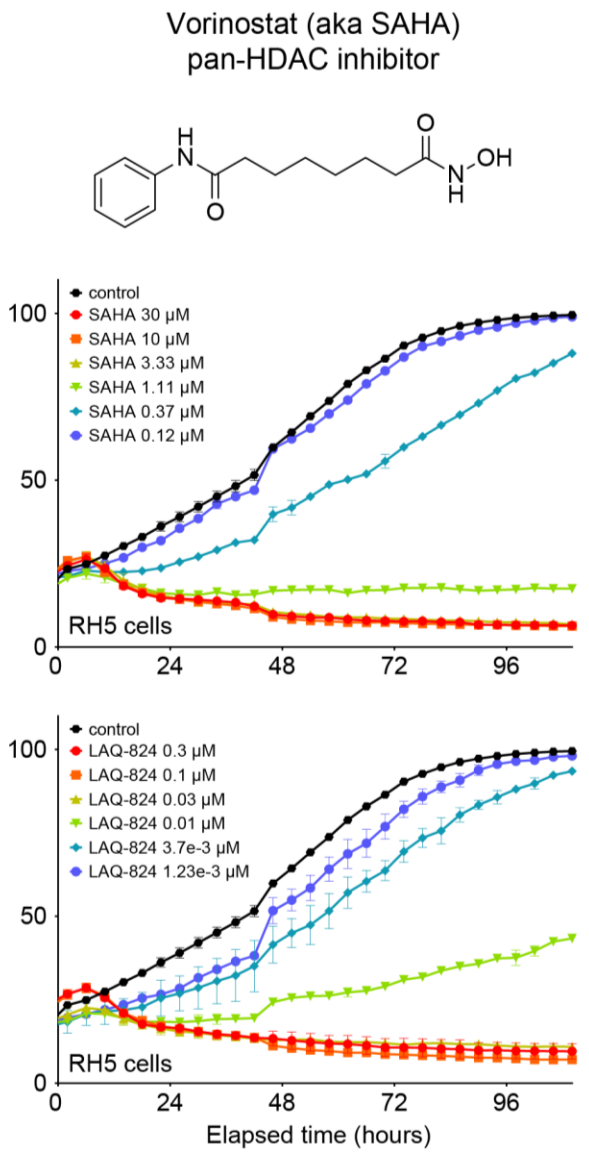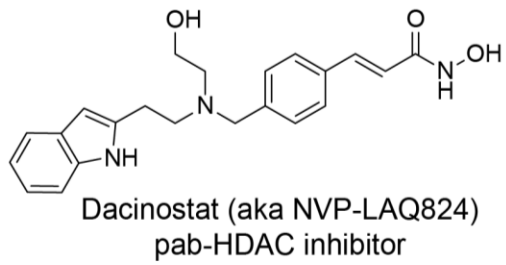

**Supplemental Figure 3. Time course of rhabdomyosarcoma cell growth inhibition with HDAC inhibitors**

(a) Time course of cell confluence (measure by phase contrast images of RH5 cells every 4 hours) for Benzamide inhibitors Merck60 (selective for HDAC1/2) and Entinostat (selective for HDAC1/2/3).

(b) Same as (a), but treated with Hydroxamic acid based pan-HDAC inhibitors SAHA (Vorinostat, above) and LAQ824 (Dacinostat).

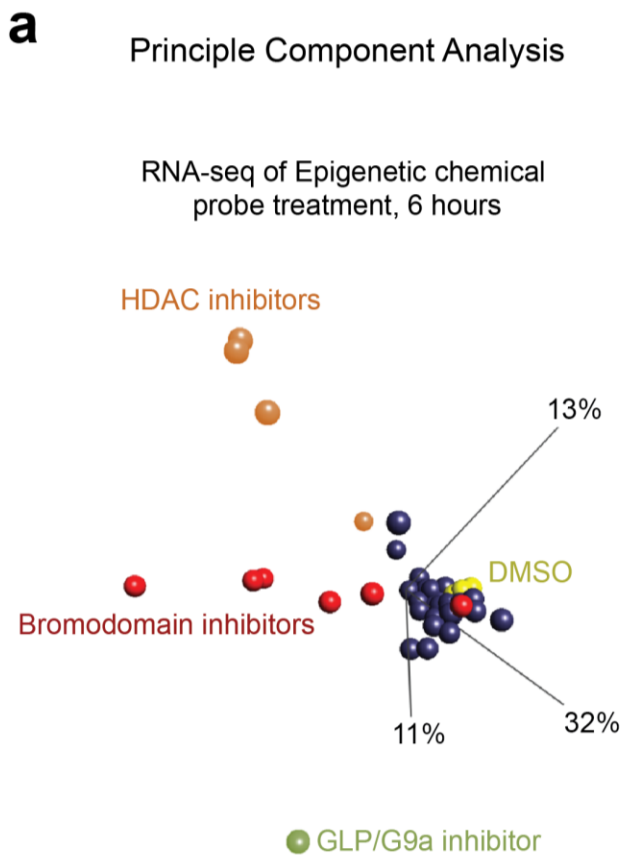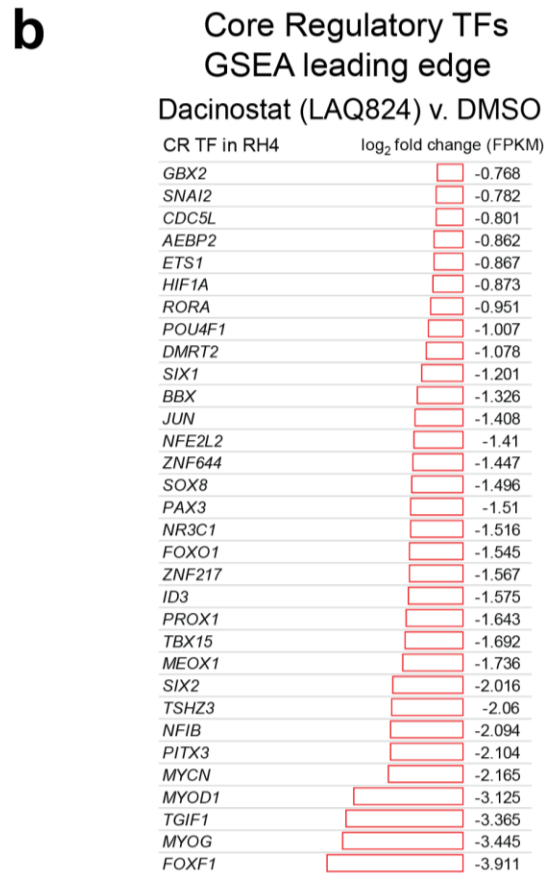

**Supplemental Figure 4. RNA-seq after epigenetic chemical probe treatment in Rhabdomyosarcoma cells**

(a) Principle component analysis of RNA-seq after 6 hours of drug treatment in RH41 cells. HDAC inhibitors are colored orange, Bromodomain inhibitors colored red, and a GLP/G9A inhibitor is colored green. Most epigenetic chemical probes (dark blue) clustered near control treatment DMSO (yellow).

(b) Example lead edge of core regulatory TFs downregulated by HDAC inhibitor LAQ824, also known clinically as Dacinostat.

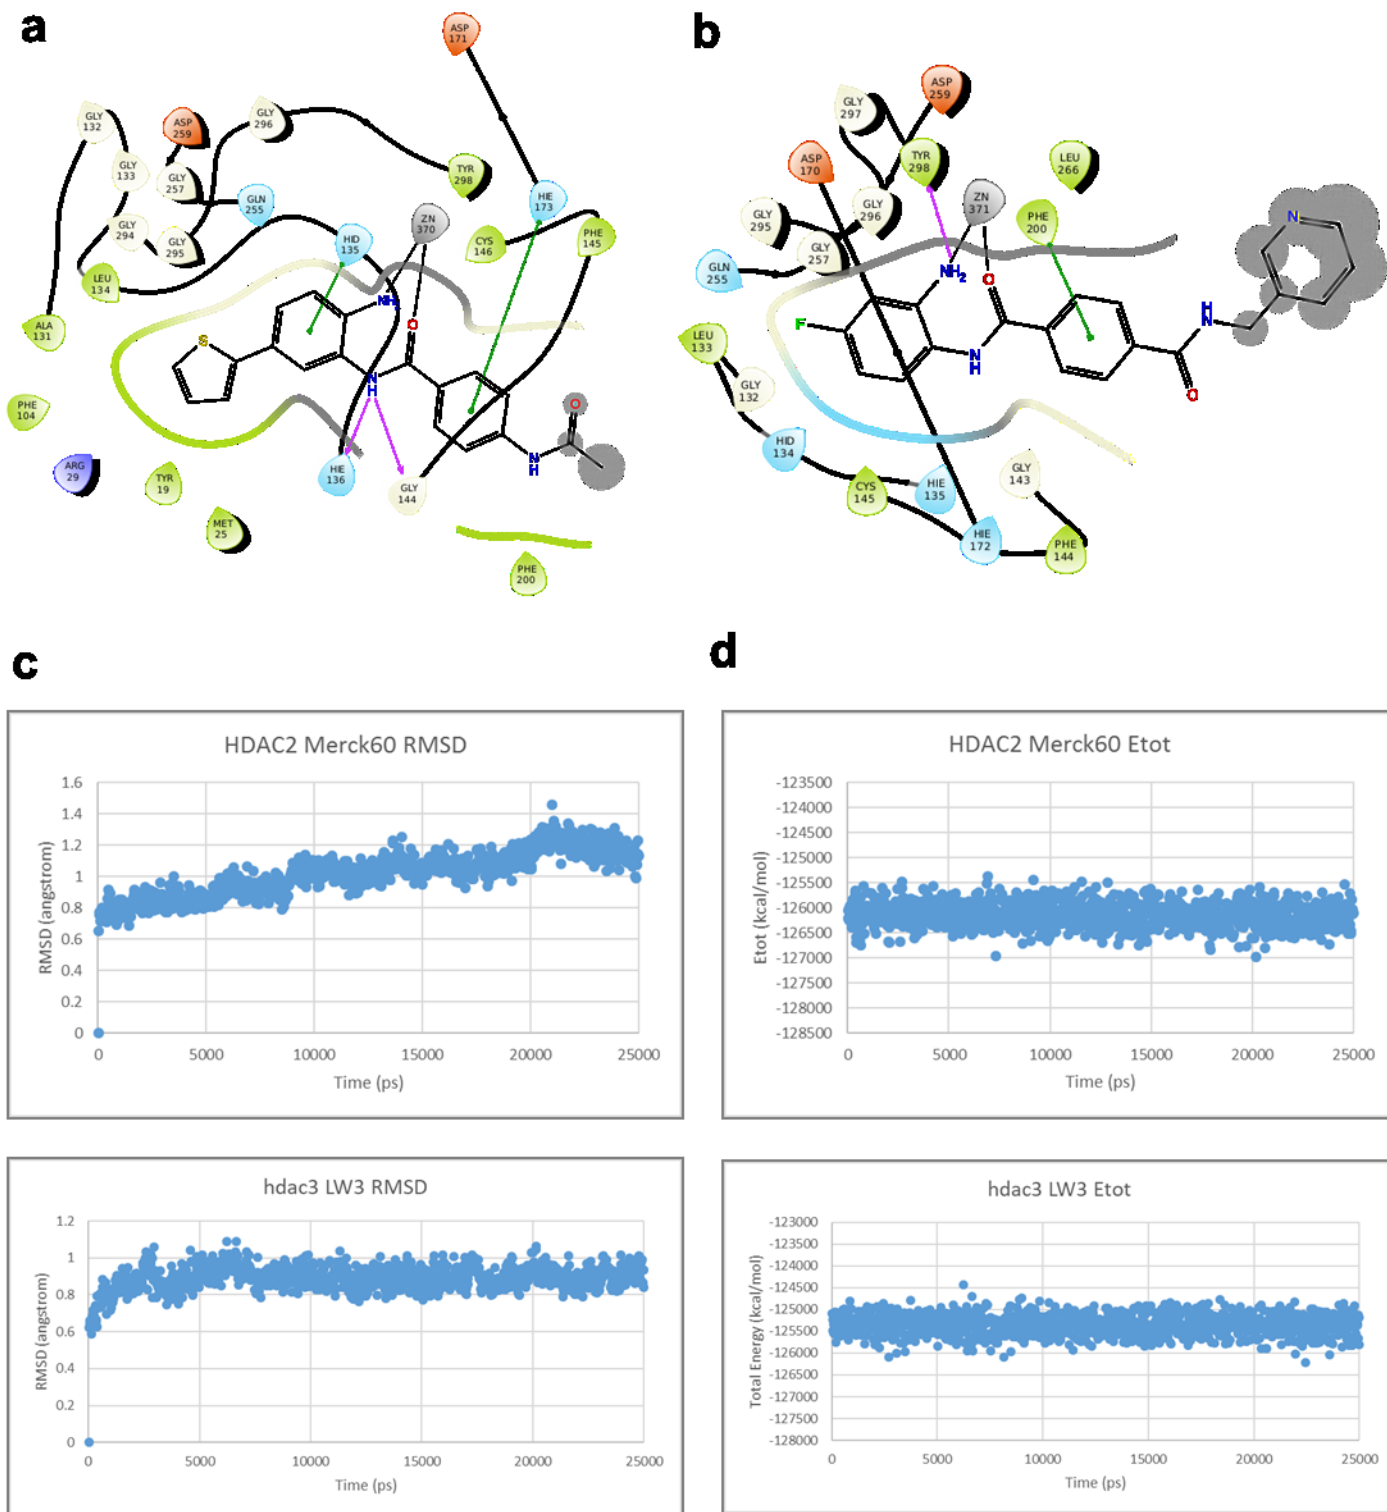

**Supplemental Figure 5. Molecular dynamics simulations for Merck60 and LW3 in HDACs**

(a, b) Interaction diagrams for Merck60/HDAC2 and LW3/HDAC3 complexes

(c, d) plots of RMSD and total energy showing convergence of MD simulations

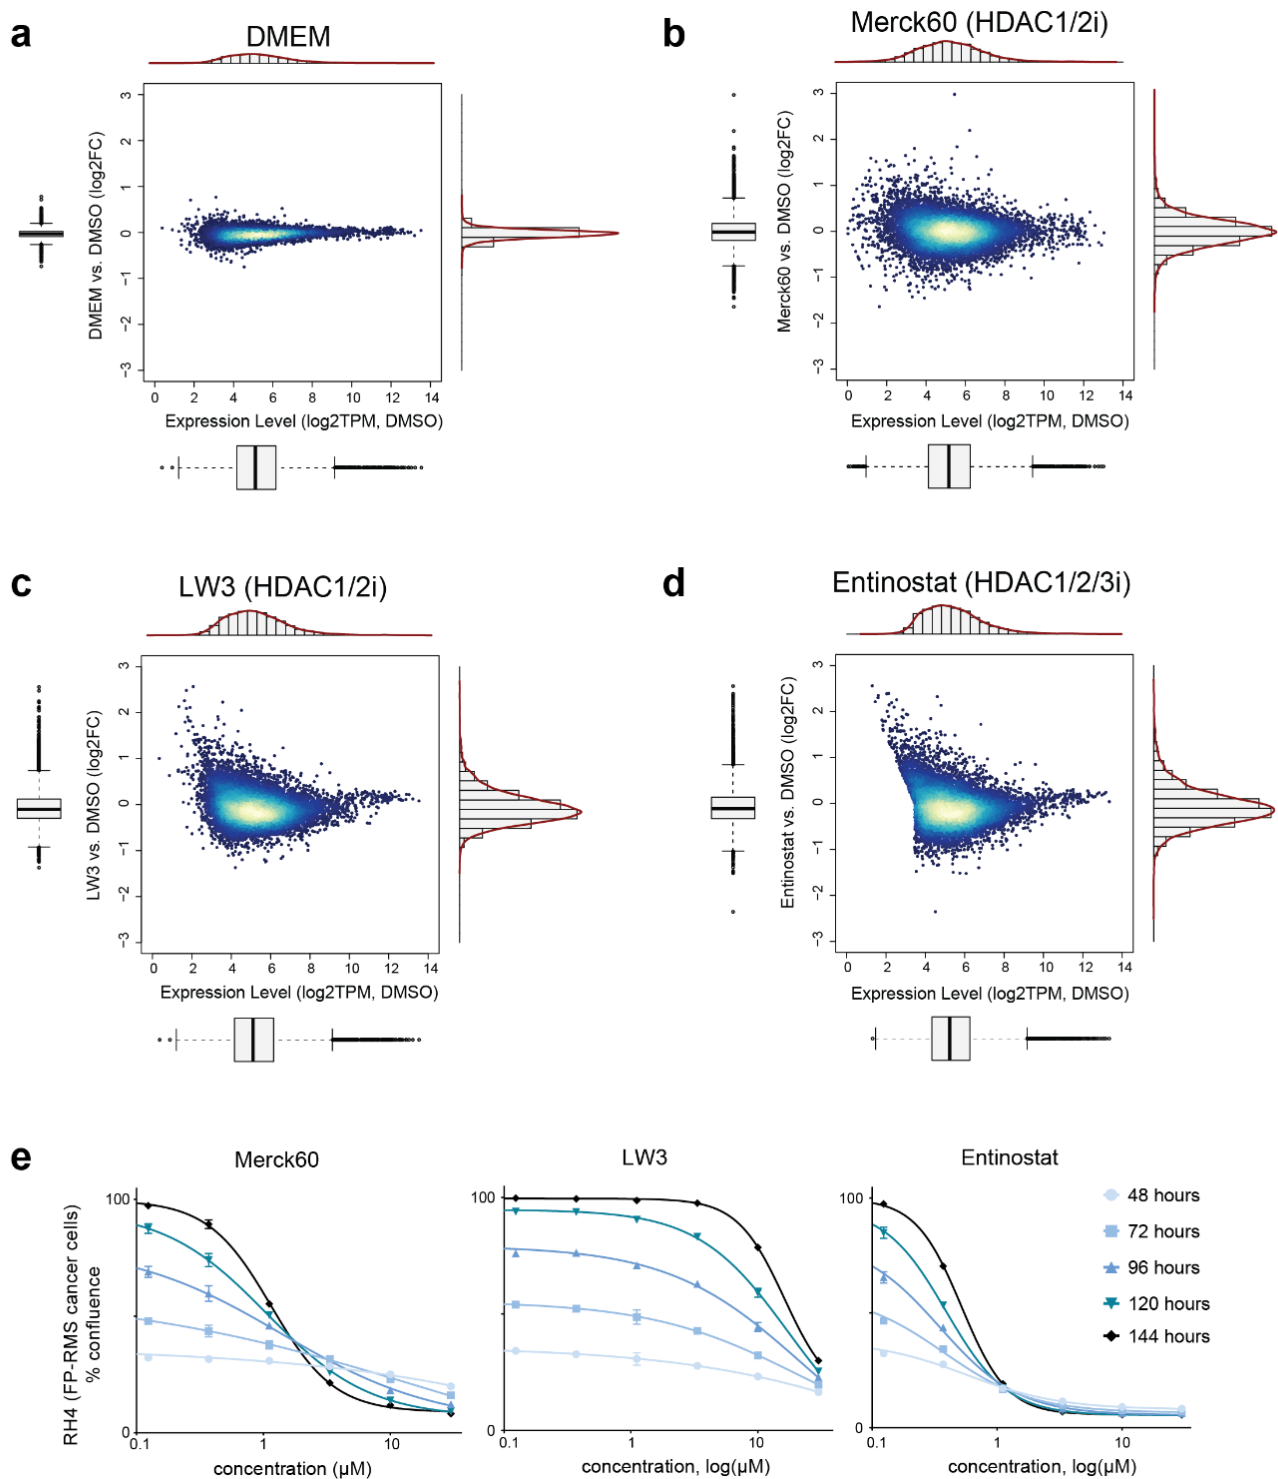

**Supplemental Figure 6. Effect of HDAC isoform 1/2/3, 1/2, or 3 selective inhibitors on global transcription and proliferation in RH4 cells**

(a-d) MA plots of gene expression changes in RH4 cells treated with the DMEM, Merck60, LW3 or Entinostat for 6 hours (compared to DMSO). Histograms and boxplots summarize the expression distribution shown in the scatter plot.

(e) Proliferation of RH4 cells treated with Merck60, LW3 or Entinostat. Confluence was measured using image analysis of phase contrast images, taken with the IncuCyte ZOOM.

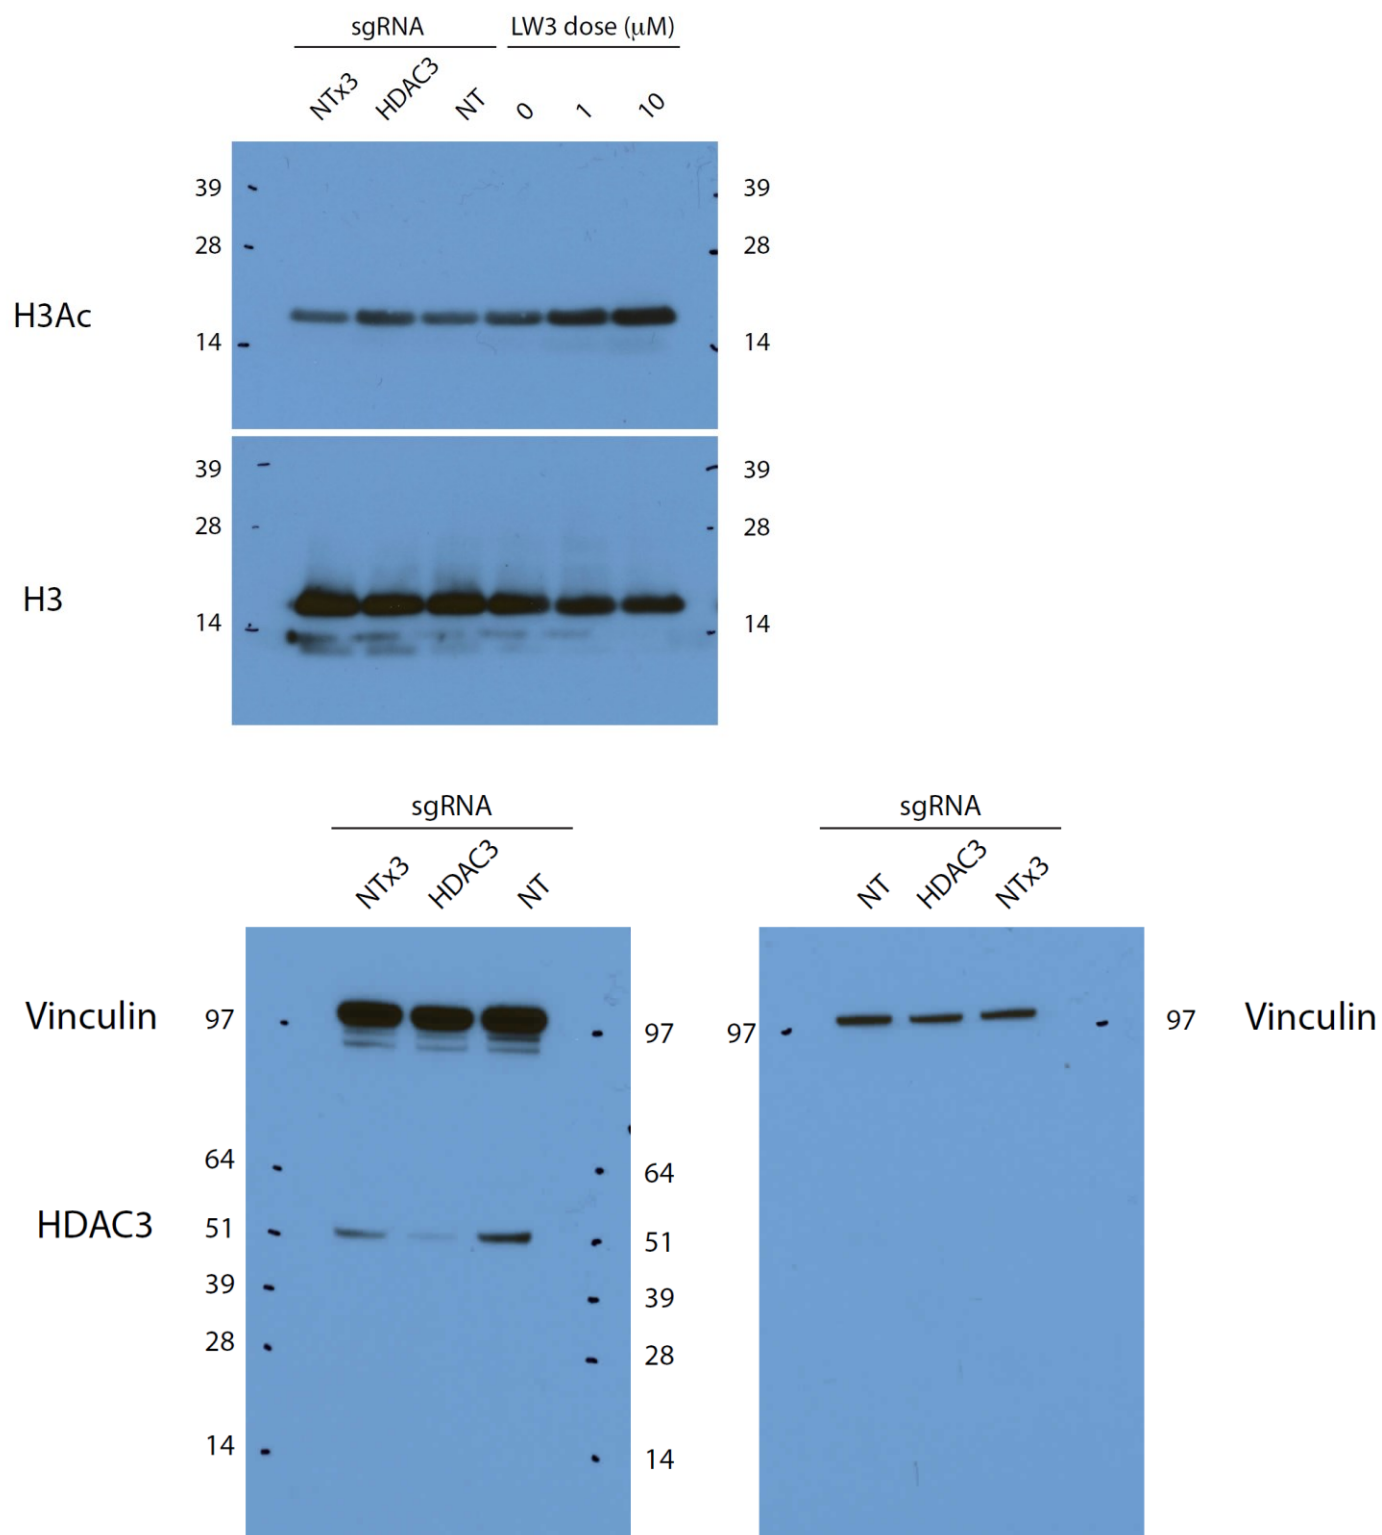

**Supplemental Figure 7.** Uncropped versions of western blots in Figure 5e, with size markers indicated.



## Supplemental Figure 8. Synthetic strategy to obtain HDAC3 selective inhibitor LW3:

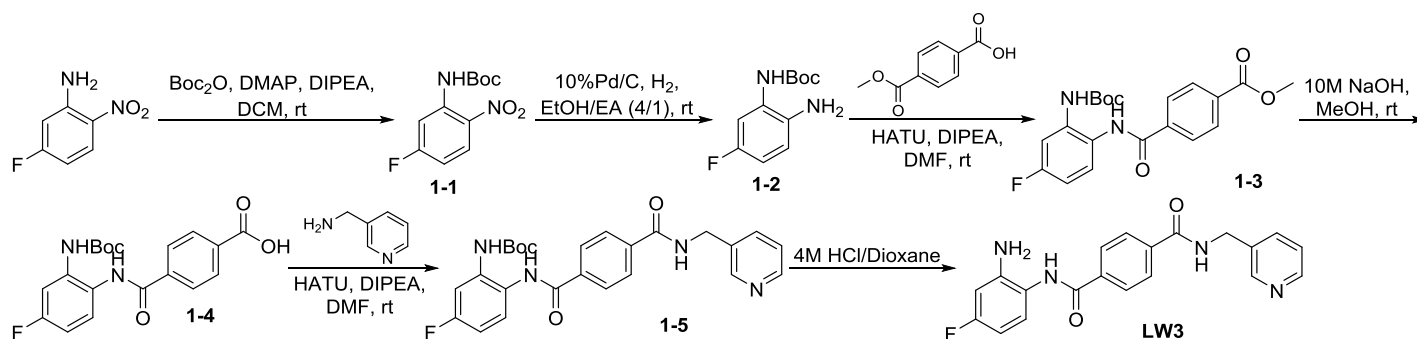

## Supplementary Methods

### (1) *tert*-Butyl (5-fluoro-2-nitrophenyl)carbamate:

To a solution of 5-fluoro-2-nitroaniline (4.5 g, 28.8 mmol), DMAP (360 mg, 2.95 mmol), and DIPEA (2.5 mL) in anhydrous DCM (60 mL) was added Boc<sub>2</sub>O (6.5 g, 29.8 mmol) in portions at room temperature. The reaction mixture was stirred at room temperature for overnight, and purified via silica gel column purification (Ethyl acetate/Hexane: 1/4, R<sub>f</sub> = 0.7) to afford **1-1** (6 g, 82% yield) as a yellow solid. MS: m/z (M+1)<sup>+</sup>: 257.20.

### (2) *tert*-Butyl (2-amino-5-fluorophenyl)carbamate:

The solution of **1-1** (6 g, 23.4 mmol) in a mixed solvent of ethanol (120 mL) and ethyl acetate (30 mL) was purged with N<sub>2</sub> 3 times followed by the addition of 10% Pd/C (100 mg). The resulting mixture was purged with H<sub>2</sub> 3 times and stirred at room temperature under H<sub>2</sub> atmosphere for 4 hours. After filtration, the filtrate was concentrated in vacuo to afford **1-2** as a white solid (5.2 g) MS: m/z (M+1)<sup>+</sup>: 227.25. <sup>1</sup>H NMR (MeOD-*d*<sub>4</sub>, 500 MHz): δ 7.12 (d, *J* = 8.5 Hz, 1H), 6.79 (dd, *J* = 8.5 Hz, 5.0 Hz, 1H), 6.70 (td, *J* = 8.5 Hz, 3.0 Hz, 1H), 1.53 (s, 9H). <sup>13</sup>C NMR (MeOD-*d*<sub>4</sub>, 500 MHz): δ 156.98, 155.12, 154.49, 117.52, 117.45, 111.22, 111.04, 79.92, 27.26.

### (3) Methyl 4-((2-((*tert*-butoxycarbonyl)amino)-4-fluorophenyl)carbamoyl)benzoate:

To a solution of **1-2** (750 mg, 3.32 mmol), 4-(methoxycarbonyl)benzoic acid (600 mg, 3.33 mmol) and HATU (1.26 g, 3.33 mmol) in DMF (7 mL) was added DIPEA (1.5 mL, 8.44 mmol). The reaction mixture was stirred at room temperature for 30 minutes, and diluted with ethyl acetate (50 mL). The resulting mixture was washed with H<sub>2</sub>O (20 mL x 3), and brine (30 mL). The organic phase was dried over anhydrous Na<sub>2</sub>SO<sub>4</sub>, and filtered. The filtrate was concentrated in vacuo, and the residue was purified via silica gel chromatography to afford **1-3** as a white solid (1.22 g, 94% yield). MS: m/z (M+H)<sup>+</sup>: 388.12.

### (4) 4-((2-((*tert*-butoxycarbonyl)amino)-4-fluorophenyl)carbamoyl)benzoic acid:

To a solution of **1-3** (1.22 g, 3.14 mmol) in MeOH (20 mL) was added 10M NaOH (2 mL). The resulting mixture was stirred at room temperature overnight. After removal of MeOH in vacuo, the residue was acidified to pH ~5 with 6M HCl. The white solid was precipitated, collected by filtration and dried in vacuo overnight to afford **1-4** (1.06 g, 90% yield). MS: m/z (M+1)<sup>+</sup>: 374.13. <sup>1</sup>H NMR (MeOD-*d*<sub>4</sub>, 500 MHz): δ 8.17 (d, *J* = 8.5 Hz, 2H), 8.07 (d, *J* = 8.5 Hz, 2H), 7.51 (dd, *J* = 9.0 Hz, 5.5 Hz, 1H), 7.46 (dd, *J* = 10.5 Hz, 3.0 Hz, 1H), 6.95 (td, *J* = 8.5 Hz, 3.0

Hz, 1H), 1.51 (s, 9H). <sup>13</sup>C NMR (MeOD-*d*<sub>4</sub>, 500 MHz): δ 167.50, 166.70, 161.86, 159.93, 154.06, 137.82, 133.89, 129.51, 127.88, 127.81, 127.45, 110.67, 110.48, 80.63, 27.13.

**(5) *tert*-butyl (5-fluoro-2-(4-((pyridin-3-ylmethyl)carbamoyl)benzamido)phenyl)carbamate:**

To the solution of **1-4** (50 mg, 0.134 mmol) and pyridin-3-ylmethanamine (18 μL, 0.180 mmol), and HATU (55 mg, 0.140 mmol) in DMF (0.4 mL) was added DIPEA (65 μL, 0.707 mmol) at room temperature. The mixture was stirred at room temperature for 80 minutes and purified *via* HPLC (0.1% TFA/MeCN) to afford **1-5** as a white solid (60 mg, 95% yield). MS: *m/z* (M+1)<sup>+</sup>: 465.21. <sup>1</sup>H NMR (MeOD-*d*<sub>4</sub>, 500 MHz): δ 8.80 (s, 1H), 8.68 (d, *J* = 5.5 Hz, 1H), 8.32 (d, *J* = 8.0 Hz, 1H), 7.98 (d, *J* = 8.5 Hz, 2H), 7.96 (t, *J* = 10.5 Hz, 1H), 7.92 (d, *J* = 8.5 Hz, 2H), 7.40 (dd, *J* = 8.5 Hz, 5.5 Hz, 1H), 7.31 (dd, *J* = 10.5 Hz, 3.0 Hz, 1H), 6.83 (td, *J* = 8.5 Hz, 3.0 Hz, 1H), 4.69 (s, 2H), 1.39 (s, 9H). <sup>13</sup>C NMR (MeOD-*d*<sub>4</sub>, 500 MHz): δ 171.67, 168.06, 166.46, 161.84, 159.90, 154.12, 145.35, 141.07, 140.57, 139.84, 137.08, 136.46, 127.70, 127.42, 127.02, 110.80, 110.62, 80.69, 40.41, 27.24.

**(6) *N*<sup>1</sup>-(2-amino-4-fluorophenyl)-*N*<sup>4</sup>-(pyridin-3-ylmethyl)terephthalamide:**

The 4M solution of HCl in dioxane (0.5 mL) was added to **1-5** (50 mg). The reaction mixture was stirred at room temperature overnight, concentrated and dried *in vacuo* to afford **LW3** as a white solid (60 mg). MS: *m/z* (M+H)<sup>+</sup>: 365.24. <sup>1</sup>H NMR (MeOD-*d*<sub>4</sub>, 500 MHz): δ 8.96 (s, 1H), 8.83 (d, *J* = 6.0 Hz, 1H), 8.72 (d, *J* = 8.5 Hz, 1H), 8.19 (d, *J* = 8.5 Hz, 2H), 8.14 (dd, *J* = 8.5 Hz, 6.0 Hz, 1H), 8.09 (d, *J* = 9.0 Hz, 2H), 7.51 (dd, *J* = 8.0 Hz, 5.5 Hz, 1H), 7.29-7.26 (m, 2H), 4.83 (s, 2H). <sup>13</sup>C NMR (MeOD-*d*<sub>4</sub>, 500 MHz): δ 168.00, 166.86, 162.01, 146.00, 140.64, 140.12, 136.76, 136.15, 128.40, 128.32, 128.12, 127.45, 127.22, 115.13, 114.97, 110.56, 110.35, 40.35.

Supplementary Table 1. Epigenetic Chemical Probes

| <b>Drug Name</b>    | <b>Source</b>        | <b>Target</b> |
|---------------------|----------------------|---------------|
| 4SC-202             | DTP                  | HDAC and LSD1 |
| A-196               | SGC - Peter Brown    | SUV420H1/H2   |
| A-366               | SGC - Peter Brown    | G9a/GLP       |
| A-366               | SGC - Peter Brown    | G9a/GLP       |
| A-395               | SGC - Peter Brown    | EED           |
| Actinomycin D       | DTP                  | RNAPol2       |
| ACY-1215            | DTP                  | HDAC6         |
| AEE788              | Selleckchem          | ERBB          |
| alpha-amantin       | DTP                  | RNAPol2       |
| ARV-825             | DTP                  | BRD4          |
| azacitidine         | DTP                  | DNMT1         |
| Barasertib          | Sam Li               | Aurora Kinase |
| BAY-299             | SGC - Peter Brown    | BRD1, TAF1    |
| BAY-598             | SGC - Peter Brown    | SMYD2         |
| BAZ2-ICR            | SGC - Peter Brown    | BAZ2A, BAZ2B  |
| BGJ398              | Mari Yohe            | FGFR          |
| BI-9564             | SGC - Peter Brown    | BRD9, BRD7    |
| Bromosporin         | SGC - Peter Brown    | pan Bromo     |
| C646                | SGC - Peter Brown    | EP300         |
| CI-994              | SGC - Peter Brown    | Class I HDACs |
| Cpd-50              | Jay Bradner & Jun Qi | pan-JMJD      |
| EX 527 (Selisistat) | Selleckchem          | Sirtuin       |
| Fascaplysin         | Santa Cruz           | CDK4          |
| Flavopiridol        | DTP                  | CDK9          |
| GSK2801             | SGC - Peter Brown    | BAZ2A/2B      |
| GSK2801             | SGC - Peter Brown    | BAZ2A/2B      |
| GSK484              | SGC - Peter Brown    | PAD-4         |
| GSK6853             | SGC - Peter Brown    | BRPF1         |
| GSK864              | SGC - Peter Brown    | Mutant IDH1   |
| GSK-J4              | Jay Bradner & Jun Qi | JMJD3         |
| GSK-LSD1            | SGC - Peter Brown    | LSD1          |
| I-Bet-151           | DTP                  | BRD2/3/4      |
| I-Bet-726           | DTP                  | BRD2/3/4      |
| I-Bet-762           | DTP                  | BRD2/3/4      |
| I-BRD9              | SGC - Peter Brown    | BRD9          |
| I-CBP 112           | SGC - Peter Brown    | CREBBP EP300  |
| Isoginkgetin        | DTP                  | Spliceosome   |
| JIB-04-E            | Martinez             | Jumonji       |
| JIB-04-Z            | Martinez             | Jumonji       |
| JQ1                 | Jay Bradner & Jun Qi | BRD2/3/4      |
| LAQ824              | SGC - Peter Brown    | HDAC          |
| LLY-507             | SGC - Peter Brown    | SMYD2         |
| LSD-519             | Jay Bradner & Jun Qi | LSD1          |
| LSD-690             | Jay Bradner & Jun Qi | LSD1          |

|                     |                      |                        |
|---------------------|----------------------|------------------------|
| MC1568              | Tocris               | Class II HDACs         |
| Merck60             | Jay Bradner & Jun Qi | HDAC1/2                |
| Mocetinostat        | DTP                  | HDAC                   |
| MS023               | SGC - Peter Brown    | Type I PRMTs           |
| MS049               | SGC - Peter Brown    | PRMT4,6                |
| MS-275 (Entinostat) | DTP                  | HDAC1/2/3              |
| NI-57               | SGC - Peter Brown    | BRPF1/2/3              |
| NP-005584           | Girma Woldemichael   | pan-HDACi              |
| NVS-CECR2-1         | SGC - Peter Brown    | CECR2                  |
| OF-1                | SGC - Peter Brown    | BRPF1/2/3              |
| OICR-9429           | SGC - Peter Brown    | WDR5/MLL               |
| OICR-9429           | SGC - Peter Brown    | WDR5/MLL               |
| OJI-1               | Jay Bradner & Jun Qi | HDAC8                  |
| Olaparib            | SGC - Peter Brown    | PARP                   |
| OTX-015             | DTP                  | BRD2/3/4               |
| Panobinostat        | DTP; Novartis        | HDAC                   |
| PFI-1               | SGC - Peter Brown    | BRD2/3/4               |
| PFI-1               | SGC - Peter Brown    | BRD2/3/4               |
| PFI-2               | SGC - Peter Brown    | SETD7                  |
| PFI-2               | SGC - Peter Brown    | SETD7                  |
| PFI-3               | SGC - Peter Brown    | SMARCA<br>bromodomains |
| PFI-3               | SGC - Peter Brown    | SMARCA<br>bromodomains |
| Pracinostat         | DTP                  | pan-HDACs              |
| Quisinostat         | DTP                  | pan-HDACs              |
| R18                 | Tocris               | 14.3.3                 |
| Rapamycin           | Khanna               | mTOR                   |
| Rigosertib          | Selleckchem          | microtubules           |
| Romidepsin          | Selleckchem          | pan-HDACs              |
| SCG-CBP30           | SGC - Peter Brown    | p300                   |
| SCH772984           | DTP                  | ERK                    |
| Selumetinib         | DTP                  | MEK                    |
| SGC0946             | SGC - Peter Brown    | DOT1L                  |
| SGC707              | SGC - Peter Brown    | PRMT3                  |
| SGC-CBP30           | SGC - Peter Brown    | CREBBP EP300           |
| Thapsigargin        | Santa Cruz           | AKT                    |
| THZ1                | Nat Gray             | CDK7                   |
| TMP195              | Axon Medchem         | Class II HDACs         |
| TP-064              | SGC - Peter Brown    | PRMT4                  |
| Trametinib          | Selleckchem          | MEK                    |
| Triptolide          | DTP                  | TFIIH                  |
| UNC0638             | SGC - Peter Brown    | G9a/GLP                |
| UNC0642             | SGC - Peter Brown    | G9a/GLP                |
| UNC1215             | SGC - Peter Brown    | L3MBTL3                |
| UNC1999             | SGC - Peter Brown    | EZH1/2                 |
| WT161               | Jay Bradner & Jun Qi | HDAC6                  |

Supplementary Table 2. Primers for 4C-seq and ChIP-qPCR

|           |                                                  |                         |
|-----------|--------------------------------------------------|-------------------------|
| 4C-seq    | MYOD1 Super Enhancer 4C viewpoint forward primer | AGGTTCTGCGACAGAGTTGG    |
|           | MYOD1 Super Enhancer 4C viewpoint reverse primer | GTTTGGGTTTGGCTGGCTTG    |
|           | MYOD1 promoter 4C viewpoint forward primer       | GGGATTCCTAACCTGGGCAG    |
|           | MYOD1 promoter 4C viewpoint reverse primer       | AGTTGGATGCTGTGTCCCG     |
| ChIP-qPCR | CTCF site IGF2 SE-proximal, forward primer       | CCACTAGATGGCAGTCACAC    |
|           | CTCF site IGF2 SE-proximal, reverse primer       | GGCCCCTGTTTAGAACAACA    |
|           | P3F site at MYOD1 SE, forward primer             | CAGAACCATCCCATTCTCCG    |
|           | P3F site at MYOD1 SE, reverse primer             | GCCTGACCTTGAACGTGAAT    |
|           | Negative control gene desert, forward primer     | AGGGAGTTTTTATGAGCATTCCA |
|           | Negative control gene desert, reverse primer     | AGCAGGTAAAGGTCCATATTTCA |

Supplementary Table 3. REAGENTS AND RESOURCES TABLE

| REAGENT or RESOURCE                                                     | SOURCE                    | IDENTIFIER                      |
|-------------------------------------------------------------------------|---------------------------|---------------------------------|
| <b>Antibodies</b>                                                       |                           |                                 |
| Rabbit polyclonal anti-HDAC2                                            | Abcam                     | Cat# 7029, RRID:AB_305706       |
| Rabbit polyclonal anti-SOX8                                             | Abcam                     | Cat# ab104245, RRID:AB_10974591 |
| Rabbit polyclonal anti-H3K27ac                                          | Active Motif              | Cat# 39133, RRID:AB_2561016     |
| Rabbit polyclonal anti-HDAC1                                            | Abcam                     | Cat# 7028, RRID:AB_305705       |
| Rabbit polyclonal anti-YY1                                              | Abcam                     | Cat# ab109237, RRID:AB_10890662 |
| Mouse monoclonal Anti-Vinculin                                          | Sigma-Aldrich             | Cat# V9264, RRID:AB_10603627    |
| Goat Polyclonal anti-mouse IgG-HRP                                      | Santa Cruz Biotechnology  | Cat# sc-2005, RRID:AB_631736    |
| Rabbit polyclonal anti-HDAC3                                            | Abcam                     | Cat# ab7030, RRID:AB_305708     |
| Rabbit polyclonal anti-Histone H3ac (acetyl K9 + K14 + K18 + K23 + K27) | Abcam                     | Cat# ab47915, RRID:AB_873860    |
| Rabbit polyclonal anti-Histone H3                                       | Cell Signaling Technology | Cat# 9715, RRID:AB_331563       |
| Goat anti-rabbit IgG-HRP                                                | Santa Cruz Biotechnology  | Cat# sc-2004, RRID:AB_631746    |
| <b>Chemicals, Peptides, and Recombinant Proteins</b>                    |                           |                                 |
| Polyethylenimine, branched PEI 25000                                    | Sigma Aldrich             | Cat# 408727                     |
| Actinomycin D                                                           | Sigma Aldrich             | Cat# A1410                      |
| List of small molecules screened, related to Figure 2, (Table S1)       | This study                | N/A                             |
|                                                                         |                           |                                 |
|                                                                         |                           |                                 |
| <b>Kits and Commercial Assays</b>                                       |                           |                                 |
| AmpFLSTR Identifiler PCR Amplification Kit                              | Life Technologies         | Cat# 4322288                    |
| Nextera DNA Library Prep Kit                                            | Illumina                  | Cat# FC-121-1030                |
| MinElute PCR Purification Kit                                           | Qiagen                    | Cat# 28004                      |
| Agencourt AMPure XP                                                     | Beckman Coulter           | Cat# A63881                     |
| ChIP-IT High Sensitivity                                                | Active Motif              | Cat# 53040                      |
| QIAamp DNA Mini Kit                                                     | Qiagen                    | Cat# 51304                      |
| T4 DNA polymerase                                                       | NEB                       | Cat# B02025                     |
| Large (Klenow) Fragment                                                 | NEB                       | Cat# M0210L                     |
| T4 polynucleotide kinase                                                | NEB                       | Cat# M0201L                     |
| Quick ligation kit                                                      | NEB                       | Cat# M2200L                     |
| Phusion master mix                                                      | Thermo Fisher Scientific  | Cat# F548L                      |
| SteadyLite Plus luciferase assay reagent powder                         | PerkinElmer               | Cat# 6066759                    |
| TruSeq ChIP Library Prep Kit                                            | Illumina                  | Cat# IP-202-1012                |
| Dynabead M-280 Streptavidin                                             | Thermo                    | Cat#: 11205D                    |
| ChIP-IT qPCR Analysis Kit                                               | Active Motif              | Cat# 53029                      |
| NextSeq500 High Output Kit v2 (75 cycles)                               | Illumina                  | Cat# FC-404-2005                |
| Nextera XT DNA Library Preparation Kit                                  | Illumina                  | Cat# FC-131-1024                |
| <b>Deposited Data</b>                                                   |                           |                                 |
| Raw and analyzed data                                                   | This paper                | GEO: GSE116344                  |
| ChIP-seq in rhabdomyosarcoma cells and tumors                           | Gryder et al 2017         | GEO: GSE83728                   |
| Topologically Associated Domain boundaries                              | Rao et al., 2014          | GEO: GSE63525                   |

|                                              |                                 |                                                                                                                                                                                                                                                                       |
|----------------------------------------------|---------------------------------|-----------------------------------------------------------------------------------------------------------------------------------------------------------------------------------------------------------------------------------------------------------------------|
| ENCODE blacklisted regions                   | ENCODE Project Consortium, 2012 | <a href="http://hgdownload.cse.ucsc.edu/goldenPath/hg19/encodeDCC/wgEncodeMapability/wgEncodeDacMapabilityConsensusExcludable.bed.gz">http://hgdownload.cse.ucsc.edu/goldenPath/hg19/encodeDCC/wgEncodeMapability/wgEncodeDacMapabilityConsensusExcludable.bed.gz</a> |
| <b>Experimental Models: Cell Lines</b>       |                                 |                                                                                                                                                                                                                                                                       |
| Human cancer cell lines: RH4, RH41, RH3, RH5 | Peter Houghton Lab              | <a href="http://gsbs.uthscsa.edu/faculty/peter-houghton-ph.d">http://gsbs.uthscsa.edu/faculty/peter-houghton-ph.d</a>                                                                                                                                                 |
| <b>Recombinant DNA</b>                       |                                 |                                                                                                                                                                                                                                                                       |
| pGreenFire1-CMV Positive Control Lentivector | System Biosciences              | Cat# TR011PA/VA-1                                                                                                                                                                                                                                                     |
| pGreenFire1-mCMV Negative Control            | System Biosciences              | Cat# TR010PA/VA-1                                                                                                                                                                                                                                                     |
| <b>Software and Algorithms</b>               |                                 |                                                                                                                                                                                                                                                                       |
| R statistical package drc                    | Christian Ritz                  | <a href="https://cran.r-project.org/web/packages/drc/drc.pdf">https://cran.r-project.org/web/packages/drc/drc.pdf</a>                                                                                                                                                 |
| NGSplot (v. 2.63)                            | Shen Lab                        | <a href="https://github.com/shenlab-sinai/ngsplot">https://github.com/shenlab-sinai/ngsplot</a>                                                                                                                                                                       |
| AMBER16                                      | Case et al, 2016                | <a href="http://ambermd.org">http://ambermd.org</a>                                                                                                                                                                                                                   |
| Gaussian09                                   | Gaussian Inc.                   | <a href="http://gaussian.com">http://gaussian.com</a>                                                                                                                                                                                                                 |
| Pymol                                        | Schrödinger Inc.                | <a href="http://schrodinger.com">http://schrodinger.com</a>                                                                                                                                                                                                           |
| Graphpad Prism                               | Graphpad Software               | <a href="https://www.graphpad.com/scientific-software/prism/">https://www.graphpad.com/scientific-software/prism/</a>                                                                                                                                                 |
| ROSE2                                        | Charles Lin Lab                 | <a href="https://github.com/linlabbcm/rose2">https://github.com/linlabbcm/rose2</a>                                                                                                                                                                                   |
| Coltron                                      | Lin et al, 2016                 | <a href="https://pypi.org/project/coltron/">https://pypi.org/project/coltron/</a>                                                                                                                                                                                     |
| Bamliquidator version 1.3.4                  | John DiMatteo                   | <a href="https://github.com/BradnerLab/pipeline/wiki/bamliquidator">https://github.com/BradnerLab/pipeline/wiki/bamliquidator</a>                                                                                                                                     |
| GSEA software version 2.2.0                  | Subramanian et al, 2005         | <a href="https://software.broadinstitute.org/gsea/">https://software.broadinstitute.org/gsea/</a>                                                                                                                                                                     |
| Bedtools version 2.27.1                      | Quinlan and Hall, 2010          | <a href="http://bedtools.readthedocs.io/en/latest/">http://bedtools.readthedocs.io/en/latest/</a>                                                                                                                                                                     |
| RNA-seq Plotting R Scripts                   | This paper                      | <a href="https://github.com/GryderArt/VisualizeRNAseq">https://github.com/GryderArt/VisualizeRNAseq</a>                                                                                                                                                               |
