# Supplementary material for: Chemical genomics reveals histone deacetylases are required for core regulatory transcription
Source: PubMed Central journal article supplement (PMC6614369; doi:10.1038/s41467-019-11046-7), 2019-07-08
Supplement: 41467_2019_11046_MOESM3_ESM.pdf [file 41467_2019_11046_MOESM3_ESM.pdf]

## Reporting Summary

Nature Research wishes to improve the reproducibility of the work that we publish. This form provides structure for consistency and transparency in reporting. For further information on Nature Research policies, see [Authors & Referees](#) and the [Editorial Policy Checklist](#).

### Statistical parameters

When statistical analyses are reported, confirm that the following items are present in the relevant location (e.g. figure legend, table legend, main text, or Methods section).

n/a Confirmed

- The exact sample size ( $n$ ) for each experimental group/condition, given as a discrete number and unit of measurement
- An indication of whether measurements were taken from distinct samples or whether the same sample was measured repeatedly
- The statistical test(s) used AND whether they are one- or two-sided  
*Only common tests should be described solely by name; describe more complex techniques in the Methods section.*
- A description of all covariates tested
- A description of any assumptions or corrections, such as tests of normality and adjustment for multiple comparisons
- A full description of the statistics including central tendency (e.g. means) or other basic estimates (e.g. regression coefficient) AND variation (e.g. standard deviation) or associated estimates of uncertainty (e.g. confidence intervals)
- For null hypothesis testing, the test statistic (e.g.  $F$ ,  $t$ ,  $r$ ) with confidence intervals, effect sizes, degrees of freedom and  $P$  value noted  
*Give  $P$  values as exact values whenever suitable.*
- For Bayesian analysis, information on the choice of priors and Markov chain Monte Carlo settings
- For hierarchical and complex designs, identification of the appropriate level for tests and full reporting of outcomes
- Estimates of effect sizes (e.g. Cohen's  $d$ , Pearson's  $r$ ), indicating how they were calculated
- Clearly defined error bars  
*State explicitly what error bars represent (e.g. SD, SE, CI)*

*Our web collection on [statistics for biologists](#) may be useful.*

### Software and code

Policy information about [availability of computer code](#)

Data collection

Data collection was performed with Illumina's NextSeq 550 system.

Data analysis

Software and Algorithms  
 R statistical package drc Christian Ritz <https://cran.r-project.org/web/packages/drc/drc.pdf>  
 NGSplot (v. 2.63) Shen Lab <https://github.com/shenlab-sinai/ngsplot>  
 MACS (v 2.1.1.20160309) Zhang et al 2008 <https://github.com/taoliu/MACS>  
 BWA (v 0.7.17) Li and Durbin, 2009 <http://bio-bwa.sourceforge.net/>  
 HOMER (Hypergeometric Optimization of Motif EnRichment) version 4.9.1 Heinz et al, 2010 <http://homer.ucsd.edu/homer/index.html>  
 Graphpad Prism Graphpad Software <https://www.graphpad.com/scientific-software/prism/>  
 ROSE2 Charles Lin Lab <https://github.com/linlabbcm/rose2>  
 Coltron Lin et al, 2016 <https://pypi.org/project/coltron/>  
 Bamliquidator version 1.3.4 John DiMatteo <https://github.com/BradnerLab/pipeline/wiki/bamliquidator>  
 GSEA software version 2.2.0 Subramanian et al, 2005 <https://software.broadinstitute.org/gsea/>  
 Bedtools version 2.27.1 Quinlan and Hall, 2010 <http://bedtools.readthedocs.io/en/latest/>

For manuscripts utilizing custom algorithms or software that are central to the research but not yet described in published literature, software must be made available to editors/reviewers upon request. We strongly encourage code deposition in a community repository (e.g. GitHub). See the Nature Research [guidelines for submitting code & software](#) for further information.

## Data

Policy information about [availability of data](#)

All manuscripts must include a [data availability statement](#). This statement should provide the following information, where applicable:

- Accession codes, unique identifiers, or web links for publicly available datasets
- A list of figures that have associated raw data
- A description of any restrictions on data availability

The data reported herein is made publicly available through the Gene Expression Omnibus (<https://www.ncbi.nlm.nih.gov/geo/>). The GEO accession number for all ChIP-seq and RNA-seq data is GSE116344.

## Field-specific reporting

Please select the best fit for your research. If you are not sure, read the appropriate sections before making your selection.

Life sciences  Behavioural & social sciences  Ecological, evolutionary & environmental sciences

For a reference copy of the document with all sections, see [nature.com/authors/policies/ReportingSummary-flat.pdf](https://www.nature.com/authors/policies/ReportingSummary-flat.pdf)

## Life sciences study design

All studies must disclose on these points even when the disclosure is negative.

|                 |                                                                                                                                                                                                                                                                                                                                                                                                                                                                                                                                                                                                                                                                                                                                                                                                                                                                                                                                                                                                                                                                                                    |
|-----------------|----------------------------------------------------------------------------------------------------------------------------------------------------------------------------------------------------------------------------------------------------------------------------------------------------------------------------------------------------------------------------------------------------------------------------------------------------------------------------------------------------------------------------------------------------------------------------------------------------------------------------------------------------------------------------------------------------------------------------------------------------------------------------------------------------------------------------------------------------------------------------------------------------------------------------------------------------------------------------------------------------------------------------------------------------------------------------------------------------|
| Sample size     | For each ChIP-seq and RNA-seq experiment, approximately 30 million uniquely mapped reads were generated.                                                                                                                                                                                                                                                                                                                                                                                                                                                                                                                                                                                                                                                                                                                                                                                                                                                                                                                                                                                           |
| Data exclusions | Regions of the genome on the ENCODE blacklist (comprised of, for instance, highly repetitive regions) were excluded from called peaks prior to all downstream analysis (ie, in ChIP-seq data sets)                                                                                                                                                                                                                                                                                                                                                                                                                                                                                                                                                                                                                                                                                                                                                                                                                                                                                                 |
| Replication     | For luciferase screening, each molecule (n = 63,000) we tested in duplicate initially at one concentration (10 uM). Validation was performed by dose response of top hits (n = 573) in technical quadruplicate. For luciferase screening of epigenetic drug panel, we performed dose response with technical quadruplicates and biological duplicates (only first biological replicate is shown in figures).<br>For cell growth of HDAC inhibitors (n = 14 inhibitors) we tested RMS cell lines (n = 8) and treated in technical duplicate and dose response. Measurements for confluence were taken every 4 hours.<br>For RNA with each small molecule tested, multiple concentrations (IC50 and IC90) were used and data analysis (ie, GSEA) was performed by treating these two concentrations as duplicates.<br>For ChIP-seq of individual factors, we have only presented one experimental dataset per factor, although in many cases we have performed these experiments in biological duplicate or triplicate, or across multiple cell lines with multiple antibodies (data not presented). |
| Randomization   | This work involved no animal studies or randomized clinical trial data. All RMS patients whose samples were obtained were not the subject of randomization at the time of sampling.                                                                                                                                                                                                                                                                                                                                                                                                                                                                                                                                                                                                                                                                                                                                                                                                                                                                                                                |
| Blinding        | Investigation was done without blinding, and epigenetic and transcriptomic analysis of primary tumors was done with diagnosis knowledge in hand.                                                                                                                                                                                                                                                                                                                                                                                                                                                                                                                                                                                                                                                                                                                                                                                                                                                                                                                                                   |

## Reporting for specific materials, systems and methods

### Materials & experimental systems

| n/a                                 | Involved in the study                                           |
|-------------------------------------|-----------------------------------------------------------------|
| <input type="checkbox"/>            | <input checked="" type="checkbox"/> Unique biological materials |
| <input type="checkbox"/>            | <input checked="" type="checkbox"/> Antibodies                  |
| <input type="checkbox"/>            | <input checked="" type="checkbox"/> Eukaryotic cell lines       |
| <input checked="" type="checkbox"/> | <input type="checkbox"/> Palaeontology                          |
| <input checked="" type="checkbox"/> | <input type="checkbox"/> Animals and other organisms            |
| <input checked="" type="checkbox"/> | <input type="checkbox"/> Human research participants            |

### Methods

| n/a                                 | Involved in the study                           |
|-------------------------------------|-------------------------------------------------|
| <input type="checkbox"/>            | <input checked="" type="checkbox"/> ChIP-seq    |
| <input checked="" type="checkbox"/> | <input type="checkbox"/> Flow cytometry         |
| <input checked="" type="checkbox"/> | <input type="checkbox"/> MRI-based neuroimaging |

## Unique biological materials

Policy information about [availability of materials](#)

Obtaining unique materials All cell lines and reagents described in the methods section are either commercially available or available upon request to the authors. Materials not available to the public include the rare and limited primary tumor samples used to generate data herein.

## Antibodies

Antibodies used Rabbit polyclonal anti-HDAC2 Abcam Cat# 7029, RRID:AB\_305706  
Rabbit polyclonal anti-SOX8 Abcam Cat# ab104245, RRID:AB\_10974591  
Rabbit polyclonal anti-H3K27ac Active Motif Cat# 39133, RRID:AB\_2561016  
Rabbit polyclonal anti-HDAC1 Abcam Cat# 7028, RRID:AB\_305705  
Rabbit polyclonal anti-YY1 Abcam Cat# ab109237, RRID:AB\_10890662  
Rabbit polyclonal anti-HDAC3, Abcam Cat# ab7030, RRID:AB\_305708  
Rabbit polyclonal anti-Histone H3ac (acetyl K9 + K14 + K18 + K23 + K27) Abcam Cat# ab47915, RRID:AB\_873860  
Rabbit polyclonal anti-Histone H3 Cell Signaling Technology Cat# 9715, RRID:AB\_331563  
Goat anti-rabbit IgG-HRP Santa Cruz Biotechnology Cat# sc-2004, RRID:AB\_631746

Validation Antibody validations are available on these websites: [www.abcam.com](http://www.abcam.com), [www.scbt.com/scbt](http://www.scbt.com/scbt) and [www.activemotif.com](http://www.activemotif.com)  
In the case of the antibodies for SOX8, which were previously validated by western blot but not validated for ChIP-seq, we evaluated enrichments at predicted SOX binding site in RMS cells by ChIP-qPCR and reviewed the products here: <https://www.abcam.com/SOX8-antibody-ab104245/reviews/57941>

## Eukaryotic cell lines

Policy information about [cell lines](#)

Cell line source(s) Human cancer cell lines: RH4, RH41, RH3, RH5 Peter Houghton Lab <http://gsbs.uthscsa.edu/faculty/peter-houghton-ph.d>  
SCMC line is from Dr. Janet Shipley, RD, SMS-CTR and Birch from Dr. Lee Helman.

Authentication Validation was performed by DNA fingerprinting AmpFISTR® Identifier® PCR Amplification Kit (Catalog Number 4322288) by Life Technologies. Additional validation was done by RNA-seq comparison to historic cell line RNA-seq data.

Mycoplasma contamination Cell lines were tested for mycoplasma frequently within one or two passages of each experiment.

Commonly misidentified lines (See [ICLAC](#) register) No misidentified cell lines were used in this study.

## ChIP-seq

Data deposition

- Confirm that both raw and final processed data have been deposited in a public database such as [GEO](#).
- Confirm that you have deposited or provided access to graph files (e.g. BED files) for the called peaks.

Data access links To review ChIP-seq and RNA-seq data, use GEO accession GSE116344:  
*May remain private before publication.* Go to <https://www.ncbi.nlm.nih.gov/geo/query/acc.cgi?acc=GSE116344>  
Enter token incneucolzutdgi into the box

Files in database submission Rh4\_DMSO\_T\_HCK52BGXY.gene.TPM.txt  
Rh4\_N1302\_T\_HCK52BGXY.gene.TPM.txt  
Rh4\_PLX1\_T\_HCK52BGXY.gene.TPM.txt  
Rh4\_PLX2\_T\_HCK52BGXY.gene.TPM.txt  
RH41Bromosporinhigh\_T\_C5JW5ACXX.gene.TPM.txt  
RH41Bromosporinlow\_T\_C5JW5ACXX.gene.TPM.txt  
RH41Cpd50high\_T\_C4JM1ACXX.gene.TPM.txt  
RH41Cpd50low\_T\_C4JM1ACXX.gene.TPM.txt  
RH41DMSOhigh\_T\_C4JM1ACXX.gene.TPM.txt  
RH41DMSOhigh\_T\_H144EBGXX.gene.TPM.txt  
RH41DMSOlow\_T\_C4JM1ACXX.gene.TPM.txt  
RH41DMSOlow\_T\_H144EBGXX.gene.TPM.txt  
RH41EZ-005high\_T\_C5JW5ACXX.gene.TPM.txt  
RH41EZ-005low\_T\_C5JW5ACXX.gene.TPM.txt  
RH41GSKJ4high\_T\_C4JM1ACXX.gene.TPM.txt  
RH41GSKJ4low\_T\_C4JM1ACXX.gene.TPM.txt  
RH41GSKLSD1high\_T\_H0VWNAGXX.gene.TPM.txt  
RH41GSKLSD1low\_T\_H0VWNAGXX.gene.TPM.txt  
RH41JQ1high\_T\_C4JM1ACXX.gene.TPM.txt

RH41JQ1low\_T\_C4JM1ACXX.gene.TPM.txt  
RH41LAQ824high\_T\_H144EBGX.gene.TPM.txt  
RH41LAQ824low\_T\_H144EBGX.gene.TPM.txt  
RH41LSD519high\_T\_C5JW5ACXX.gene.TPM.txt  
RH41LSD519low\_T\_C5JW5ACXX.gene.TPM.txt  
RH41LSD690high\_T\_C5JW5ACXX.gene.TPM.txt  
RH41LSD690low\_T\_C5JW5ACXX.gene.TPM.txt  
RH41MC1568high\_T\_H144EBGX.gene.TPM.txt  
RH41MC1568low\_T\_H144EBGX.gene.TPM.txt  
RH41Merck60high\_T\_C5JW5ACXX.gene.TPM.txt  
RH41Merck60low\_T\_C5JW5ACXX.gene.TPM.txt  
RH41OJ11high\_T\_C5JW5ACXX.gene.TPM.txt  
RH41OJ11low\_T\_C5JW5ACXX.gene.TPM.txt  
RH41PFI2high\_T\_C5JW5ACXX.gene.TPM.txt  
RH41PFI2low\_T\_C5JW5ACXX.gene.TPM.txt  
RH41PFI3high\_T\_C5JW5ACXX.gene.TPM.txt  
RH41PFI3low\_T\_C5JW5ACXX.gene.TPM.txt  
RH41SGC0946high\_T\_C5JW5ACXX.gene.TPM.txt  
RH41SGC0946low\_T\_C5JW5ACXX.gene.TPM.txt  
RH41SGCCBP30high\_T\_C5JW5ACXX.gene.TPM.txt  
RH41SGCCBP30low\_T\_C5JW5ACXX.gene.TPM.txt  
RH41Tramhigh\_T\_C5JW5ACXX.gene.TPM.txt  
RH41Tramlow\_T\_C5JW5ACXX.gene.TPM.txt  
RH41UNC0638high\_T\_C5JW5ACXX.gene.TPM.txt  
RH41UNC0638low\_T\_C5JW5ACXX.gene.TPM.txt  
RH41UNC1215high\_T\_HOVVNAGXX.gene.TPM.txt  
RH41UNC1215low\_T\_HOVVNAGXX.gene.TPM.txt  
RH41UNC1999high\_T\_C5JW5ACXX.gene.TPM.txt  
RH41UNC1999low\_T\_C5JW5ACXX.gene.TPM.txt  
RH41WT161high\_T\_C5JW5ACXX.gene.TPM.txt  
RH41WT161low\_T\_C5JW5ACXX.gene.TPM.txt  
RH4\_D1\_T\_HVNVFBGX2.gene.TPM.txt  
RH4\_D24\_T\_HVNVFBGX2.gene.TPM.txt  
RH4\_D6\_T\_HVNVFBGX2.gene.TPM.txt  
RH4\_ENT1\_T\_HVNVFBGX2.gene.TPM.txt  
RH4\_ENT24\_T\_HVNVFBGX2.gene.TPM.txt  
RH4\_ENT6\_T\_HVNVFBGX2.gene.TPM.txt  
Sample\_RH41Bromosporinhigh\_T\_C5JW5ACXX\_R1.fastq.gz  
Sample\_RH41Bromosporinhigh\_T\_C5JW5ACXX\_R2.fastq.gz  
Sample\_RH41Bromosporinlow\_T\_C5JW5ACXX\_R1.fastq.gz  
Sample\_RH41Bromosporinlow\_T\_C5JW5ACXX\_R2.fastq.gz  
Sample\_RH41Cpd50high\_T\_C4JM1ACXX\_R1.fastq.gz  
Sample\_RH41Cpd50high\_T\_C4JM1ACXX\_R2.fastq.gz  
Sample\_RH41Cpd50low\_T\_C4JM1ACXX\_R1.fastq.gz  
Sample\_RH41Cpd50low\_T\_C4JM1ACXX\_R2.fastq.gz  
Sample\_RH41DMSOhigh\_T\_C4JM1ACXX\_R1.fastq.gz  
Sample\_RH41DMSOhigh\_T\_C4JM1ACXX\_R2.fastq.gz  
Sample\_RH41DMSOhigh\_T\_H144EBGX\_R1.fastq.gz  
Sample\_RH41DMSOhigh\_T\_H144EBGX\_R2.fastq.gz  
Sample\_RH41DMSOlow\_T\_C4JM1ACXX\_R1.fastq.gz  
Sample\_RH41DMSOlow\_T\_C4JM1ACXX\_R2.fastq.gz  
Sample\_RH41DMSOlow\_T\_H144EBGX\_R1.fastq.gz  
Sample\_RH41DMSOlow\_T\_H144EBGX\_R2.fastq.gz  
Sample\_RH41EZ-005high\_T\_C5JW5ACXX\_R1.fastq.gz  
Sample\_RH41EZ-005high\_T\_C5JW5ACXX\_R2.fastq.gz  
Sample\_RH41EZ-005low\_T\_C5JW5ACXX\_R1.fastq.gz  
Sample\_RH41EZ-005low\_T\_C5JW5ACXX\_R2.fastq.gz  
Sample\_RH41GSKJ4high\_T\_C4JM1ACXX\_R1.fastq.gz  
Sample\_RH41GSKJ4high\_T\_C4JM1ACXX\_R2.fastq.gz  
Sample\_RH41GSKJ4low\_T\_C4JM1ACXX\_R1.fastq.gz  
Sample\_RH41GSKJ4low\_T\_C4JM1ACXX\_R2.fastq.gz  
Sample\_RH41GSKLSD1high\_T\_HOVVNAGXX\_R1.fastq.gz  
Sample\_RH41GSKLSD1high\_T\_HOVVNAGXX\_R2.fastq.gz  
Sample\_RH41GSKLSD1low\_T\_HOVVNAGXX\_R1.fastq.gz  
Sample\_RH41GSKLSD1low\_T\_HOVVNAGXX\_R2.fastq.gz  
Sample\_RH41JQ1high\_T\_C4JM1ACXX\_R1.fastq.gz  
Sample\_RH41JQ1high\_T\_C4JM1ACXX\_R2.fastq.gz  
Sample\_RH41JQ1low\_T\_C4JM1ACXX\_R1.fastq.gz  
Sample\_RH41JQ1low\_T\_C4JM1ACXX\_R2.fastq.gz  
Sample\_RH41LAQ824high\_T\_H144EBGX\_R1.fastq.gz  
Sample\_RH41LAQ824high\_T\_H144EBGX\_R2.fastq.gz  
Sample\_RH41LAQ824low\_T\_H144EBGX\_R1.fastq.gz  
Sample\_RH41LAQ824low\_T\_H144EBGX\_R2.fastq.gz  
Sample\_RH41LSD519high\_T\_C5JW5ACXX\_R1.fastq.gz  
Sample\_RH41LSD519high\_T\_C5JW5ACXX\_R2.fastq.gz

Sample\_RH41LSD519low\_T\_C5JW5ACXX\_R1.fastq.gz  
Sample\_RH41LSD519low\_T\_C5JW5ACXX\_R2.fastq.gz  
Sample\_RH41LSD690high\_T\_C5JW5ACXX\_R1.fastq.gz  
Sample\_RH41LSD690high\_T\_C5JW5ACXX\_R2.fastq.gz  
Sample\_RH41LSD690low\_T\_C5JW5ACXX\_R1.fastq.gz  
Sample\_RH41LSD690low\_T\_C5JW5ACXX\_R2.fastq.gz  
Sample\_RH41MC1568high\_T\_H144EBGXX\_R1.fastq.gz  
Sample\_RH41MC1568high\_T\_H144EBGXX\_R2.fastq.gz  
Sample\_RH41MC1568low\_T\_H144EBGXX\_R1.fastq.gz  
Sample\_RH41MC1568low\_T\_H144EBGXX\_R2.fastq.gz  
Sample\_RH41Merck60high\_T\_C5JW5ACXX\_R1.fastq.gz  
Sample\_RH41Merck60high\_T\_C5JW5ACXX\_R2.fastq.gz  
Sample\_RH41Merck60low\_T\_C5JW5ACXX\_R1.fastq.gz  
Sample\_RH41Merck60low\_T\_C5JW5ACXX\_R2.fastq.gz  
Sample\_RH41OJI1high\_T\_C5JW5ACXX\_R1.fastq.gz  
Sample\_RH41OJI1high\_T\_C5JW5ACXX\_R2.fastq.gz  
Sample\_RH41OJI1low\_T\_C5JW5ACXX\_R1.fastq.gz  
Sample\_RH41OJI1low\_T\_C5JW5ACXX\_R2.fastq.gz  
Sample\_RH41PFI2high\_T\_C5JW5ACXX\_R1.fastq.gz  
Sample\_RH41PFI2high\_T\_C5JW5ACXX\_R2.fastq.gz  
Sample\_RH41PFI2low\_T\_C5JW5ACXX\_R1.fastq.gz  
Sample\_RH41PFI2low\_T\_C5JW5ACXX\_R2.fastq.gz  
Sample\_RH41PFI3high\_T\_C5JW5ACXX\_R1.fastq.gz  
Sample\_RH41PFI3high\_T\_C5JW5ACXX\_R2.fastq.gz  
Sample\_RH41PFI3low\_T\_C5JW5ACXX\_R1.fastq.gz  
Sample\_RH41PFI3low\_T\_C5JW5ACXX\_R2.fastq.gz  
Sample\_RH41SGC0946high\_T\_C5JW5ACXX\_R1.fastq.gz  
Sample\_RH41SGC0946high\_T\_C5JW5ACXX\_R2.fastq.gz  
Sample\_RH41SGC0946low\_T\_C5JW5ACXX\_R1.fastq.gz  
Sample\_RH41SGC0946low\_T\_C5JW5ACXX\_R2.fastq.gz  
Sample\_RH41SGCCBP30high\_T\_C5JW5ACXX\_R1.fastq.gz  
Sample\_RH41SGCCBP30high\_T\_C5JW5ACXX\_R2.fastq.gz  
Sample\_RH41SGCCBP30low\_T\_C5JW5ACXX\_R1.fastq.gz  
Sample\_RH41SGCCBP30low\_T\_C5JW5ACXX\_R2.fastq.gz  
Sample\_RH41Tramhigh\_T\_C5JW5ACXX\_R1.fastq.gz  
Sample\_RH41Tramhigh\_T\_C5JW5ACXX\_R2.fastq.gz  
Sample\_RH41Tramlow\_T\_C5JW5ACXX\_R1.fastq.gz  
Sample\_RH41Tramlow\_T\_C5JW5ACXX\_R2.fastq.gz  
Sample\_RH41UNC0638high\_T\_C5JW5ACXX\_R1.fastq.gz  
Sample\_RH41UNC0638high\_T\_C5JW5ACXX\_R2.fastq.gz  
Sample\_RH41UNC0638low\_T\_C5JW5ACXX\_R1.fastq.gz  
Sample\_RH41UNC0638low\_T\_C5JW5ACXX\_R2.fastq.gz  
Sample\_RH41UNC1215high\_T\_H0VWNAGXX\_R1.fastq.gz  
Sample\_RH41UNC1215high\_T\_H0VWNAGXX\_R2.fastq.gz  
Sample\_RH41UNC1215low\_T\_H0VWNAGXX\_R1.fastq.gz  
Sample\_RH41UNC1215low\_T\_H0VWNAGXX\_R2.fastq.gz  
Sample\_RH41UNC1999high\_T\_C5JW5ACXX\_R1.fastq.gz  
Sample\_RH41UNC1999high\_T\_C5JW5ACXX\_R2.fastq.gz  
Sample\_RH41UNC1999low\_T\_C5JW5ACXX\_R1.fastq.gz  
Sample\_RH41UNC1999low\_T\_C5JW5ACXX\_R2.fastq.gz  
Sample\_RH41WT161high\_T\_C5JW5ACXX\_R1.fastq.gz  
Sample\_RH41WT161high\_T\_C5JW5ACXX\_R2.fastq.gz  
Sample\_RH41WT161low\_T\_C5JW5ACXX\_R1.fastq.gz  
Sample\_RH41WT161low\_T\_C5JW5ACXX\_R2.fastq.gz  
Sample\_RH4\_D1\_T\_HVNVFBGX2\_R1.fastq.gz  
Sample\_RH4\_D1\_T\_HVNVFBGX2\_R2.fastq.gz  
Sample\_RH4\_D24\_T\_HVNVFBGX2\_R1.fastq.gz  
Sample\_RH4\_D24\_T\_HVNVFBGX2\_R2.fastq.gz  
Sample\_RH4\_D6\_T\_HVNVFBGX2\_R1.fastq.gz  
Sample\_RH4\_D6\_T\_HVNVFBGX2\_R2.fastq.gz  
Sample\_Rh4\_DMSO\_T\_HCK52BGXY\_R1.fastq.gz  
Sample\_Rh4\_DMSO\_T\_HCK52BGXY\_R2.fastq.gz  
Sample\_RH4\_ENT1\_T\_HVNVFBGX2\_R1.fastq.gz  
Sample\_RH4\_ENT1\_T\_HVNVFBGX2\_R2.fastq.gz  
Sample\_RH4\_ENT24\_T\_HVNVFBGX2\_R1.fastq.gz  
Sample\_RH4\_ENT24\_T\_HVNVFBGX2\_R2.fastq.gz  
Sample\_RH4\_ENT6\_T\_HVNVFBGX2\_R1.fastq.gz  
Sample\_RH4\_ENT6\_T\_HVNVFBGX2\_R2.fastq.gz  
Sample\_Rh4\_N1302\_T\_HCK52BGXY\_R1.fastq.gz  
Sample\_Rh4\_N1302\_T\_HCK52BGXY\_R2.fastq.gz  
Sample\_Rh4\_PLX1\_T\_HCK52BGXY\_R1.fastq.gz  
Sample\_Rh4\_PLX1\_T\_HCK52BGXY\_R2.fastq.gz  
Sample\_Rh4\_PLX2\_T\_HCK52BGXY\_R1.fastq.gz  
Sample\_Rh4\_PLX2\_T\_HCK52BGXY\_R2.fastq.gz

## ChIP-seq:

Sample\_RH4\_HDAC2\_005\_C\_H7WKVBGXX\_peaks.narrowPeak.nobl.GREAT.bed  
 Sample\_RH4\_SOX8\_016\_C\_HJ73HBGXY\_peaks.narrowPeak.nobl.GREAT.bed  
 Sample\_RH3\_H3K27ac\_016\_C\_HJ73HBGXY\_peaks.narrowPeak.nobl.GREAT.bed  
 Sample\_RH4\_D6\_bioJQ1\_016\_C\_HJ73HBGXY\_peaks.narrowPeak.nobl.GREAT.bed  
 Sample\_RH4\_D6\_H3K27ac\_018\_C\_HWC77BGXY\_peaks.narrowPeak.nobl.GREAT.bed  
 Sample\_RH4\_Ent1\_H3K27ac\_018\_C\_HWC77BGXY\_peaks.narrowPeak.nobl.GREAT.bed  
 Sample\_RH4\_Ent6\_H3K27ac\_018\_C\_HWC77BGXY\_peaks.narrowPeak.nobl.GREAT.bed  
 Sample\_RH4\_D6\_Pol2\_018\_C\_HWC77BGXY\_peaks.narrowPeak.nobl.GREAT.bed  
 Sample\_RH4\_Ent1\_Pol2\_018\_C\_HWC77BGXY\_peaks.narrowPeak.nobl.GREAT.bed  
 Sample\_RH4\_Ent6\_Pol2\_018\_C\_HWC77BGXY\_peaks.narrowPeak.nobl.GREAT.bed  
 Sample\_RH30\_H3K27ac\_016\_C\_H5JKVBGX3\_peaks.narrowPeak.nobl.GREAT.bed  
 Sample\_RH4\_D6\_H3K36ac\_021\_C\_H5JKVBGX3\_peaks.narrowPeak.nobl.GREAT.bed  
 Sample\_RH4\_Ent6\_H3K36ac\_021\_C\_H5JKVBGX3\_peaks.narrowPeak.nobl.GREAT.bed  
 Sample\_RH4\_D6\_RAD21\_021\_C\_H5JKVBGX3\_peaks.narrowPeak.nobl.GREAT.bed  
 Sample\_RH4\_Ent6\_RAD21\_021\_C\_H5JKVBGX3\_peaks.narrowPeak.nobl.GREAT.bed  
 Sample\_RH4\_D6\_HDAC2\_021\_C\_H5JKVBGX3\_peaks.narrowPeak.nobl.GREAT.bed  
 Sample\_RH4\_Ent6\_HDAC2\_021\_C\_H5JKVBGX3\_peaks.narrowPeak.nobl.GREAT.bed  
 Sample\_RH4\_D6\_HDAC1\_024\_C\_HLFMLBGX3\_peaks.narrowPeak.nobl.GREAT.bed  
 Sample\_RH4\_D6\_RAD21\_025\_C\_HFH72BGX5\_peaks.narrowPeak.nobl.GREAT.bed  
 Sample\_RH4\_Ent6\_RAD21\_025\_C\_HFH72BGX5\_peaks.narrowPeak.nobl.GREAT.bed  
 Sample\_RH4\_D6\_YY1\_025\_C\_HFH72BGX5\_peaks.narrowPeak.nobl.GREAT.bed  
 Sample\_RH4\_Ent6\_YY1\_025\_C\_HFH72BGX5\_peaks.narrowPeak.nobl.GREAT.bed  
 Sample\_RH4\_DMSO\_6hr\_ATAC\_H7H5CBGX5\_peaks.narrowPeak.nobl.GREAT.bed  
 Sample\_RH4\_Ent\_1hr\_ATAC\_H7H5CBGX5\_peaks.narrowPeak.nobl.GREAT.bed  
 Sample\_RH4\_Ent\_6hr\_ATAC\_H7H5CBGX5\_peaks.narrowPeak.nobl.GREAT.bed  
 Sample\_RH4\_HDAC2\_005\_C\_H7WKVBGXX\_R1.fastq.gz  
 Sample\_RH4\_SOX8\_016\_C\_HJ73HBGXY\_R1.fastq.gz  
 Sample\_RH3\_H3K27ac\_016\_C\_HJ73HBGXY\_R1.fastq.gz  
 Sample\_RH3\_input\_016\_C\_HJ73HBGXY\_R1.fastq.gz  
 Sample\_RH4\_D6\_bioJQ1\_016\_C\_HJ73HBGXY\_R1.fastq.gz  
 Sample\_RH4\_D6\_H3K27ac\_018\_C\_HWC77BGXY\_R1.fastq.gz  
 Sample\_RH4\_Ent1\_H3K27ac\_018\_C\_HWC77BGXY\_R1.fastq.gz  
 Sample\_RH4\_Ent6\_H3K27ac\_018\_C\_HWC77BGXY\_R1.fastq.gz  
 Sample\_RH4\_D6\_Pol2\_018\_C\_HWC77BGXY\_R1.fastq.gz  
 Sample\_RH4\_Ent1\_Pol2\_018\_C\_HWC77BGXY\_R1.fastq.gz  
 Sample\_RH4\_Ent6\_Pol2\_018\_C\_HWC77BGXY\_R1.fastq.gz  
 Sample\_RH30\_H3K27ac\_016\_C\_H5JKVBGX3\_R1.fastq.gz  
 Sample\_RH30\_input\_016\_C\_H5JKVBGX3\_R1.fastq.gz  
 Sample\_RH4\_D6\_H3K36ac\_021\_C\_H5JKVBGX3\_R1.fastq.gz  
 Sample\_RH4\_Ent6\_H3K36ac\_021\_C\_H5JKVBGX3\_R1.fastq.gz  
 Sample\_RH4\_D6\_RAD21\_021\_C\_H5JKVBGX3\_R1.fastq.gz  
 Sample\_RH4\_Ent6\_RAD21\_021\_C\_H5JKVBGX3\_R1.fastq.gz  
 Sample\_RH4\_D6\_HDAC2\_021\_C\_H5JKVBGX3\_R1.fastq.gz  
 Sample\_RH4\_Ent6\_HDAC2\_021\_C\_H5JKVBGX3\_R1.fastq.gz  
 Sample\_RH4\_D6\_HDAC1\_024\_C\_HLFMLBGX3\_R1.fastq.gz  
 Sample\_RH4\_D6\_RAD21\_025\_C\_HFH72BGX5\_R1.fastq.gz  
 Sample\_RH4\_Ent6\_RAD21\_025\_C\_HFH72BGX5\_R1.fastq.gz  
 Sample\_RH4\_D6\_YY1\_025\_C\_HFH72BGX5\_R1.fastq.gz  
 Sample\_RH4\_Ent6\_YY1\_025\_C\_HFH72BGX5\_R1.fastq.gz  
 Sample\_RH4\_DMSO\_6hr\_ATAC\_H7H5CBGX5\_R1.fastq.gz  
 Sample\_RH4\_Ent\_1hr\_ATAC\_H7H5CBGX5\_R1.fastq.gz  
 Sample\_RH4\_Ent\_6hr\_ATAC\_H7H5CBGX5\_R1.fastq.gz  
 Sample\_RH4\_DMSO\_6hr\_ATAC\_H7H5CBGX5\_R2.fastq.gz  
 Sample\_RH4\_Ent\_1hr\_ATAC\_H7H5CBGX5\_R2.fastq.gz  
 Sample\_RH4\_Ent\_6hr\_ATAC\_H7H5CBGX5\_R2.fastq.gz

Genome browser session  
(e.g. [UCSC](#))

We viewed all datasets in IGV, not a public browser website. TDF files, a compressed version of BEDGRAPHS for IGV viewing, can be made available to reviewers if needed.

## Methodology

Replicates

ChIP-seq replicates were performed across multiple cell lines rather than multiple experiments per cell line, with the exception of RAD21 in RH4 cells, which was performed in biological duplicate (deposited as Rep1 and Rep2).

Sequencing depth

All ChIP-seq and ChIP-Rx experiments were performed in single-end read mode, 75 base pairs. Spike in reads were measured in parallel mapping to dm3 and hg19, with results as follows:

ChIP-Rx Sample name Human\_Reads  
 Sample\_RH4\_D6\_BRD4\_024\_C\_HLFMLBGX3 33045619  
 Sample\_RH4\_D6\_HDAC2\_021\_C\_H5JKVBGX3 23460819  
 Sample\_RH4\_D6\_p300\_024\_C\_HLFMLBGX3 26822752  
 Sample\_RH4\_D6\_RAD21\_021\_C\_H5JKVBGX3 16714974  
 Sample\_RH4\_D6\_RAD21\_025\_C\_HFH72BGX5 51895856  
 Sample\_RH4\_D6\_YY1\_025\_C\_HFH72BGX5 23373134  
 Sample\_RH4\_Ent6\_BRD4\_024\_C\_HLFMLBGX3 72847125

Sample\_RH4\_Ent6\_HDAC2\_021\_C\_H5JKVBGX3 24487174  
 Sample\_RH4\_Ent6\_p300\_024\_C\_HLFMLBGX3 22568713  
 Sample\_RH4\_Ent6\_RAD21\_021\_C\_H5JKVBGX3 22368744  
 Sample\_RH4\_Ent6\_RAD21\_025\_C\_HFH72BGX5 37802129  
 Sample\_RH4\_Ent6\_YY1\_025\_C\_HFH72BGX5 40957167  
 Sample\_RH4\_D6\_H3K27ac\_018\_C\_HWC77BGXY 29336224  
 Sample\_RH4\_D6\_Pol2\_018\_C\_HWC77BGXY 45354877  
 Sample\_RH4\_Ent1\_H3K27ac\_018\_C\_HWC77BGXY 31486542  
 Sample\_RH4\_Ent1\_Pol2\_018\_C\_HWC77BGXY 33191147  
 Sample\_RH4\_Ent6\_H3K27ac\_018\_C\_HWC77BGXY 38211649  
 Sample\_RH4\_Ent6\_Pol2\_018\_C\_HWC77BGXY 35643654  
 Sample\_RH4\_D6\_H3K36ac\_021\_C\_H5JKVBGX3 29947004  
 Sample\_RH4\_Ent6\_H3K36ac\_021\_C\_H5JKVBGX3 22926282

ChIP-Rx Sample name Spikeln\_Drosophila\_Reads  
 Sample\_RH4\_D6\_BRD4\_024\_C\_HLFMLBGX3 1072779  
 Sample\_RH4\_D6\_HDAC2\_021\_C\_H5JKVBGX3 423584  
 Sample\_RH4\_D6\_p300\_024\_C\_HLFMLBGX3 3786163  
 Sample\_RH4\_D6\_RAD21\_021\_C\_H5JKVBGX3 949948  
 Sample\_RH4\_D6\_RAD21\_025\_C\_HFH72BGX5 813980  
 Sample\_RH4\_D6\_YY1\_025\_C\_HFH72BGX5 659906  
 Sample\_RH4\_Ent6\_BRD4\_024\_C\_HLFMLBGX3 2023651  
 Sample\_RH4\_Ent6\_HDAC2\_021\_C\_H5JKVBGX3 606145  
 Sample\_RH4\_Ent6\_p300\_024\_C\_HLFMLBGX3 4025804  
 Sample\_RH4\_Ent6\_RAD21\_021\_C\_H5JKVBGX3 1263186  
 Sample\_RH4\_Ent6\_RAD21\_025\_C\_HFH72BGX5 414133  
 Sample\_RH4\_Ent6\_YY1\_025\_C\_HFH72BGX5 781349  
 Sample\_RH4\_D6\_H3K27ac\_018\_C\_HWC77BGXY 650454  
 Sample\_RH4\_D6\_Pol2\_018\_C\_HWC77BGXY 3661245  
 Sample\_RH4\_Ent1\_H3K27ac\_018\_C\_HWC77BGXY 663539  
 Sample\_RH4\_Ent1\_Pol2\_018\_C\_HWC77BGXY 2647315  
 Sample\_RH4\_Ent6\_H3K27ac\_018\_C\_HWC77BGXY 586269  
 Sample\_RH4\_Ent6\_Pol2\_018\_C\_HWC77BGXY 3687619  
 Sample\_RH4\_D6\_H3K36ac\_021\_C\_H5JKVBGX3 694793  
 Sample\_RH4\_Ent6\_H3K36ac\_021\_C\_H5JKVBGX3 373765

## Antibodies

same antibodies listed above.

## Peak calling parameters

Peaks were called using MACS2 (version 2.1.1.20160309, <https://github.com/taoliu/MACS>) using “narrow” mode for all targets reported in this paper, as they form sharp genomic peaks. Parameters for MACS2 usage: [--format BAM --control input.bam --keep-dup all --pvalue 0.0000001]. Regions called as peaks which are known to be spurious mapping artifacts were removed before any further analysis (reference locations for sites black-listed by the ENCODE consortium, <https://sites.google.com/site/anshulkundaje/projects/blacklists>).

## Data quality

Samples are listed with the number of peaks at a threshold of  $p < 1 \times 10^{-7}$  in the 2nd column, and, in the 3rd column, the number of peaks with at least 5-fold or more enrichment are reported.

SampleFile PEAKS\_PVALUE7 PEAKS\_FOLD\_CHANGE5  
 Sample\_RH4\_H3K27ac\_001\_C\_H5TLGBGX 69895 66719  
 Sample\_RH4\_HDAC2\_005\_C\_H7WKVBGX 31422 29444  
 Sample\_SCMC\_H3K27ac\_008\_C\_HHC7JBGXX 39084 38125  
 Sample\_RH5\_H3K27ac\_008\_C\_HHC7JBGXX 37036 38696  
 Sample\_RD\_H3K27ac\_008\_C\_HHC7JBGXX 41078 38039  
 Sample\_RH18\_H3K27ac\_009\_C\_HHC7KBGXX 58143 54262  
 Sample\_CTR\_D48\_H3K27ac\_010\_C\_HMKGLBGXX 38141 36786  
 Sample\_CTR\_T48\_H3K27ac\_010\_C\_HMKGLBGXX 33382 33273  
 Sample\_RH4\_SOX8\_016\_C\_HJ73HBGXY 5190 5069  
 Sample\_RH3\_H3K27ac\_016\_C\_HJ73HBGXY 40904 35683  
 Sample\_RH3\_P3F\_016\_C\_HJ73HBGXY 4609 4365  
 Sample\_RH4\_D6\_bioJQ1\_016\_C\_HJ73HBGXY 21905 20612  
 Sample\_RMS559\_H3K27ac\_016\_C\_HJ73HBGXY 54360 41203  
 Sample\_RMS238\_H3K27ac\_007\_C\_HHF57BGXX 4988 3107  
 Sample\_RMS209\_H3K27ac\_007\_C\_HHF57BGXX 31464 33674  
 Sample\_NCI0082\_H3K27ac\_007\_C\_HHF57BGXX 29736 28428  
 Sample\_RMS206\_H3K27ac\_007\_C\_HHF57BGXX 28789 30773  
 Sample\_RMS216\_H3K27ac\_007\_C\_HHF57BGXX 33656 34696  
 Sample\_RMS008\_H3K27ac\_007\_C\_HHF57BGXX 32943 31325  
 Sample\_NCI0075\_H3K27ac\_007\_C\_HHF57BGXX 23894 25122  
 Sample\_RH4\_D6\_H3K27ac\_018\_C\_HWC77BGXY 62043 58677  
 Sample\_RH4\_Ent1\_H3K27ac\_018\_C\_HWC77BGXY 63599 60301  
 Sample\_RH4\_Ent6\_H3K27ac\_018\_C\_HWC77BGXY 71043 64212  
 Sample\_RH4\_D6\_Pol2\_018\_C\_HWC77BGXY 27014 24297  
 Sample\_RH4\_Ent1\_Pol2\_018\_C\_HWC77BGXY 21338 19232



Sample\_RH4\_Ent6\_Pol2\_018\_C\_HWC77BGXY 29228 26854  
Sample\_Birch\_H3K27ac\_016\_C\_H5JKVBGX3 27818 27711  
Sample\_RH30\_H3K27ac\_016\_C\_H5JKVBGX3 37404 36761  
Sample\_RH4\_D6\_H3K36ac\_021\_C\_H5JKVBGX3 21309 20147  
Sample\_RH4\_Ent6\_H3K36ac\_021\_C\_H5JKVBGX3 13744 13319  
Sample\_RH4\_D6\_RAD21\_021\_C\_H5JKVBGX3 13350 13351  
Sample\_RH4\_Ent6\_RAD21\_021\_C\_H5JKVBGX3 21278 21256  
Sample\_RH4\_D6\_HDAC2\_021\_C\_H5JKVBGX3 14590 14266  
Sample\_RH4\_Ent6\_HDAC2\_021\_C\_H5JKVBGX3 28588 27817  
Sample\_RH4\_D6\_HDAC1\_024\_C\_HLFMLBGX3 75609 72600  
Sample\_RH4\_D6\_RAD21\_025\_C\_HFH72BGX5 37633 36978  
Sample\_RH4\_Ent6\_RAD21\_025\_C\_HFH72BGX5 39160 38543  
Sample\_RH4\_D6\_YY1\_025\_C\_HFH72BGX5 24398 23081  
Sample\_RH4\_Ent6\_YY1\_025\_C\_HFH72BGX5 18963 17921  
Sample\_RH4\_DMSO\_6hr\_ATAC\_H7H5CBGX5 15440 13650  
Sample\_RH4\_Ent\_1hr\_ATAC\_H7H5CBGX5 29204 27063  
Sample\_RH4\_Ent\_6hr\_ATAC\_H7H5CBGX5 49207 45234

## Software

Motif analysis was performed on peaks called from MACS2, using findMotifsGenome.pl from HOMER version 4.9.1 (<http://homer.ucsd.edu/homer/index.html>). Super enhancers were identified using the ROSE2 package (<https://github.com/linlabbcm/rose2>) employing stitching parameter of 12500 bp. The scripts used for core regulatory analysis are available here (<https://pypi.org/project/coltron/>). For peak comparisons, we used Bedtools version 2.27.1 (<http://bedtools.readthedocs.io/en/latest/>). Plots of ChIP-seq data were made with NGSplot v. 2.63 (<https://github.com/shenlab-sinai/ngsplot>).
